# Supplementary material for: Benchmarking long-read genome sequence alignment tools for human genomics applications
Source: bioRxiv preprint, doi:10.1101/2021.07.09.451840, version 3 (2023-06-20)
Supplement: Supplemental File 3 [file 451840_file11.xlsx]

## Sheet: PB_minimap2
#rname	startpos	endpos	numreads	covbases	coverage	meandepth	meanbaseq	meanmapq
chr1	1	248956422	394575	229847529	92.3244	20.0049	81.7	54.3
chr2	1	242193529	384780	239297137	98.8041	20.1343	81.7	59
chr3	1	198295559	413832	197413608	99.5552	20.5557	81.8	46
chr4	1	190214555	325789	188495637	99.0963	20.7247	81.9	55.4
chr5	1	181538259	311564	178231949	98.1787	20.3439	81.8	54.4
chr6	1	170805979	276060	169231355	99.0781	20.4916	81.8	58.3
chr7	1	159345973	250374	158085787	99.2092	19.7661	81.6	57.9
chr8	1	145138636	233253	144053825	99.2526	20.279	81.7	57.9
chr9	1	138394717	189250	119397372	86.2731	17.2704	81.6	56.9
chr10	1	133797422	215387	132297369	98.8789	20.0826	81.6	57.4
chr11	1	135086622	212193	133905289	99.1255	19.8058	81.6	58.5
chr12	1	133275309	210161	132672932	99.548	19.9493	81.7	58.8
chr13	1	114364328	190944	97565865	85.3114	18.1764	81.8	48.9
chr14	1	107043718	142067	88382534	82.5668	16.8162	81.6	59.1
chr15	1	101991189	131589	83384041	81.7561	16.3256	81.6	57.5
chr16	1	90338345	155926	81389297	90.0939	19.5281	81.5	53.7
chr17	1	83257441	131613	81221022	97.5541	18.8278	81.2	53.2
chr18	1	80373285	126252	79010589	98.3045	19.7389	81.8	56.6
chr19	1	58617616	79396	55721202	95.0588	16.8674	80.9	58.7
chr20	1	64444167	105923	63232266	98.1195	20.0554	81.5	54.7
chr21	1	46709983	71148	37561552	80.4144	18.4984	81.3	50.7
chr22	1	50818468	63354	36913416	72.6378	14.0173	81.1	50.6
chrX	1	156040895	122940	152794684	97.9196	9.97983	81.7	58
chrY	1	57227415	40451	23418212	40.9213	8.21933	82.3	23.4
chrM	1	16569	2630	16569	100	1203.88	81.8	59.8
chr1_KI270706v1_random	1	175055	324	175055	100	22.7072	81	48.3
chr1_KI270707v1_random	1	32032	39	32032	100	13.7291	81.7	54
chr1_KI270708v1_random	1	127682	140	127682	100	12.9074	83.9	46.2
chr1_KI270709v1_random	1	66860	3413	66860	100	602.956	83.3	34.3
chr1_KI270710v1_random	1	40176	77	40176	100	23.2457	82.8	34.9
chr1_KI270711v1_random	1	42210	129	42210	100	34.6601	81.2	46.6
chr1_KI270712v1_random	1	176043	243	117698	66.8575	9.72658	81.3	25.4
chr1_KI270713v1_random	1	40745	110	37420	91.8395	32.296	81.5	41
chr1_KI270714v1_random	1	41717	58	40846	97.9121	15.3779	80.9	46.7
chr2_KI270715v1_random	1	161471	240	159405	98.7205	18.2069	81.4	19.6
chr2_KI270716v1_random	1	153799	448	143121	93.0572	34.2995	81.9	11.6
chr3_GL000221v1_random	1	155397	446	152373	98.054	36.1086	80.7	13.8
chr4_GL000008v2_random	1	209709	1455	209705	99.9981	47.1849	82	34.4
chr5_GL000208v1_random	1	92689	210	92689	100	25.4401	82	51.1
chr9_KI270717v1_random	1	40062	46	40062	100	13.867	83.1	31.2
chr9_KI270718v1_random	1	38054	100	37510	98.5705	25.0228	83.1	26.3
chr9_KI270719v1_random	1	176845	477	176844	99.9994	32.8674	81.9	40.6
chr9_KI270720v1_random	1	39050	88	39050	100	24.1064	82.2	52.9
chr11_KI270721v1_random	1	100316	83	95981	95.6787	10.421	79	25.1
chr14_GL000009v2_random	1	201709	1050	201709	100	62.6725	81.8	39.2
chr14_GL000225v1_random	1	211173	10079	198725	94.1053	225.673	81.6	15.2
chr14_KI270722v1_random	1	194050	337	192981	99.4491	19.8985	81.6	49.8
chr14_GL000194v1_random	1	191469	938	191457	99.9937	59.813	81.7	43.5
chr14_KI270723v1_random	1	38115	168	38114	99.9974	39.0914	81.4	41.8
chr14_KI270724v1_random	1	39555	166	39555	100	39.3017	83.1	39.2
chr14_KI270725v1_random	1	172810	339	172140	99.6123	23.642	81.4	51
chr14_KI270726v1_random	1	43739	1	1753	4.00786	0.0400786	91.3	1
chr15_KI270727v1_random	1	448248	185	206503	46.0689	5.21587	81.6	17.7
chr16_KI270728v1_random	1	1872759	1378	1539274	82.1929	8.06938	81.7	27
chr17_GL000205v2_random	1	185591	776	175794	94.7212	48.5103	82.1	50.8
chr17_KI270729v1_random	1	280839	2810	261066	92.9593	37.2238	82.8	20.5
chr17_KI270730v1_random	1	112551	545	99390	88.3066	17.3542	82.4	19.5
chr22_KI270731v1_random	1	150754	228	149926	99.4508	18.4949	82.2	24.8
chr22_KI270732v1_random	1	41543	263	41543	100	74.6506	81.2	52.1
chr22_KI270733v1_random	1	179772	3671	179770	99.9989	249.282	77.6	22.8
chr22_KI270734v1_random	1	165050	2481	150542	91.2099	27.1917	81.3	4.74
chr22_KI270735v1_random	1	42811	312	42811	100	64.3635	83.2	35.8
chr22_KI270736v1_random	1	181920	1428	169972	93.4323	28.466	82.3	26.2
chr22_KI270737v1_random	1	103838	365	99517	95.8387	13.56	83.4	34.6
chr22_KI270738v1_random	1	99375	338	96730	97.3384	27.3289	81.8	37
chr22_KI270739v1_random	1	73985	51	64581	87.2893	5.45259	82.5	18
chrY_KI270740v1_random	1	37240	46	37104	99.6348	14.3713	80.9	53.8
chrUn_KI270303v1	1	1942	3	1940	99.897	2.3723	91.3	20.7
chrUn_KI270305v1	1	1472	1	678	46.0598	0.460598	92.6	15
chrUn_KI270320v1	1	4416	1	564	12.7717	0.127717	92.2	36
chrUn_KI270310v1	1	1201	6	1201	100	4.69942	88.3	1
chrUn_KI270315v1	1	2276	1	537	23.594	0.23594	91.2	1
chrUn_KI270317v1	1	37690	1	1182	3.13611	0.0313611	60	1
chrUn_KI270411v1	1	2646	3	2583	97.619	2.36206	86.1	5
chrUn_KI270414v1	1	2489	1	530	21.2937	0.212937	90.9	24
chrUn_KI270419v1	1	1029	3	1027	99.8056	2.76968	82.5	6.33
chrUn_KI270418v1	1	2145	3	2137	99.627	2.52028	82.4	24
chrUn_KI270420v1	1	2321	4	2291	98.7075	3.13055	90.8	14.5
chrUn_KI270417v1	1	2043	10	2043	100	8.80568	79.1	58.1
chrUn_KI270422v1	1	1445	1	1443	99.8616	0.998616	90	26
chrUn_KI270423v1	1	981	2	980	99.8981	1.37819	88.5	2
chrUn_KI270429v1	1	1361	1	1199	88.097	0.88097	92.8	46
chrUn_KI270442v1	1	392061	2667	371764	94.823	52.8385	81.8	39
chrUn_KI270466v1	1	1233	553	1233	100	466.024	81.3	16
chrUn_KI270465v1	1	1774	5	674	37.9932	1.54228	61.6	7.8
chrUn_KI270467v1	1	3920	12788	3920	100	8637.87	82.5	17.7
chrUn_KI270435v1	1	92983	548	92962	99.9774	39.1105	82.3	32.3
chrUn_KI270438v1	1	112505	23711	84183	74.826	963.62	82.6	39.4
chrUn_KI270468v1	1	4055	31	4047	99.8027	25.0545	80.9	55.6
chrUn_KI270510v1	1	2415	91	2415	100	79.2137	80.1	26.9
chrUn_KI270509v1	1	2318	1	478	20.6212	0.206212	92.6	60
chrUn_KI270518v1	1	2186	33	2186	100	29.194	88	25.3
chrUn_KI270508v1	1	1951	15	1946	99.7437	14.165	77.4	50
chrUn_KI270516v1	1	1300	57	1300	100	56.2977	85.1	53.3
chrUn_KI270512v1	1	22689	83	22683	99.9736	25.5455	81.9	41.2
chrUn_KI270519v1	1	138126	680	135688	98.2349	42.216	82	34.4
chrUn_KI270522v1	1	5674	22	5666	99.859	17.1599	77.9	52.2
chrUn_KI270511v1	1	8127	56	8123	99.9508	36.1697	84.8	53.6
chrUn_KI270515v1	1	6361	102	6360	99.9843	73.3435	83	47.8
chrUn_KI270507v1	1	5353	37	5353	100	27.8948	80.5	49.4
chrUn_KI270517v1	1	3253	113	3253	100	99.4599	82.3	54.4
chrUn_KI270529v1	1	1899	18	893	47.0247	4.9742	83.7	12.6
chrUn_KI270528v1	1	2983	9	1601	53.6708	2.36708	85.2	12.2
chrUn_KI270538v1	1	91309	757	64024	70.118	45.009	81.1	36.8
chrUn_KI270544v1	1	1202	2	891	74.1265	1.1822	92.2	1.5
chrUn_KI270548v1	1	1599	1	397	24.828	0.24828	53.6	0
chrUn_KI270587v1	1	2969	88	2969	100	68.9448	84.6	36.4
chrUn_KI270579v1	1	31033	27	28676	92.4049	7.30848	85.2	5.81
chrUn_KI270589v1	1	44474	249	34256	77.0248	19.4137	82	37.2
chrUn_KI270590v1	1	4685	151	4684	99.9787	108.767	83.5	29.8
chrUn_KI270584v1	1	4513	49	4513	100	31.3929	81.1	53.5
chrUn_KI270582v1	1	6504	1	1367	21.0178	0.210178	92	38
chrUn_KI270588v1	1	6158	79	6155	99.9513	53.8959	84.4	39.6
chrUn_KI270593v1	1	3041	15	2906	95.5607	11.3088	84.9	15.5
chrUn_KI270591v1	1	5796	174	5796	100	103.763	83.5	30.3
chrUn_KI270330v1	1	1652	5	1642	99.3947	2.20157	85	56.2
chrUn_KI270333v1	1	2699	4710	2699	100	4208.13	82.6	4.32
chrUn_KI270336v1	1	1026	61	1026	100	48.5565	83.5	4.36
chrUn_KI270337v1	1	1121	21	1121	100	17.8885	84.5	9.33
chrUn_KI270390v1	1	2387	1	1513	63.385	0.63385	48.5	1
chrUn_KI270395v1	1	1143	3	1142	99.9125	2.05162	91	1
chrUn_KI270382v1	1	4215	3	3973	94.2586	1.94235	82.1	14.3
chrUn_KI270448v1	1	7992	43	7992	100	29.8029	83.3	48.1
chrUn_KI270521v1	1	7642	20	7642	100	13.2485	79.9	48.1
chrUn_GL000195v1	1	182896	662	182809	99.9524	46.2879	82.4	40.9
chrUn_GL000219v1	1	179198	463	179198	100	26.4017	80.5	55
chrUn_GL000220v1	1	161802	3661	144896	89.5514	279.013	77.3	7.33
chrUn_GL000224v1	1	179693	1666	179693	100	103.533	81.5	46.5
chrUn_KI270741v1	1	157432	105	144104	91.5341	7.26942	82.6	15.5
chrUn_GL000226v1	1	15008	799	15008	100	644.086	82.4	12.2
chrUn_GL000213v1	1	164239	71	115456	70.2976	5.22426	81.4	38.6
chrUn_KI270743v1	1	210658	612	210658	100	32.1947	82	51.4
chrUn_KI270744v1	1	168472	1839	167687	99.534	70.5063	81.6	30.3
chrUn_KI270745v1	1	41891	18	41890	99.9976	4.97911	84.9	43.6
chrUn_KI270746v1	1	66486	351	66486	100	60.8056	82.8	53.6
chrUn_KI270747v1	1	198735	177	182670	91.9164	8.47316	82.5	24.6
chrUn_KI270748v1	1	93321	29	58945	63.1637	3.5327	85.4	6.72
chrUn_KI270749v1	1	158759	388	158759	100	29.2982	82.5	54.2
chrUn_KI270750v1	1	148850	438	148850	100	36.2754	81.9	46.9
chrUn_KI270751v1	1	150742	885	150308	99.7121	58.4675	81.9	32.2
chrUn_KI270753v1	1	62944	144	62013	98.5209	28.7754	83.2	30.1
chrUn_KI270754v1	1	40191	231	40191	100	70.3268	80	35.3
chrUn_KI270755v1	1	36723	24	36723	100	8.15301	83.9	40.7
chrUn_KI270756v1	1	79590	267	66048	82.9853	19.622	82.2	21.3
chrUn_KI270757v1	1	71251	790	61851	86.8072	71.2607	81.2	30.6
chrUn_GL000214v1	1	137718	1185	137524	99.8591	102.323	80.8	30.1
chrUn_KI270742v1	1	186739	842	186739	100	55.5199	81.3	38.1
chrUn_GL000216v2	1	176608	3141	176565	99.9757	81.0294	82.4	17.4
chrUn_GL000218v1	1	161147	519	161147	100	40.8049	82	51.8
chrEBV	1	171823	2864	159996	93.1168	183.537	79.8	52.8
chrUn_KI270302v1	1	2274	0	0	0	0	0	0
chrUn_KI270304v1	1	2165	0	0	0	0	0	0
chrUn_KI270322v1	1	21476	0	0	0	0	0	0
chrUn_KI270316v1	1	1444	0	0	0	0	0	0
chrUn_KI270312v1	1	998	0	0	0	0	0	0
chrUn_KI270311v1	1	12399	0	0	0	0	0	0
chrUn_KI270412v1	1	1179	0	0	0	0	0	0
chrUn_KI270424v1	1	2140	0	0	0	0	0	0
chrUn_KI270425v1	1	1884	0	0	0	0	0	0
chrUn_KI270530v1	1	2168	0	0	0	0	0	0
chrUn_KI270539v1	1	993	0	0	0	0	0	0
chrUn_KI270583v1	1	1400	0	0	0	0	0	0
chrUn_KI270580v1	1	1553	0	0	0	0	0	0
chrUn_KI270581v1	1	7046	0	0	0	0	0	0
chrUn_KI270329v1	1	1040	0	0	0	0	0	0
chrUn_KI270334v1	1	1368	0	0	0	0	0	0
chrUn_KI270335v1	1	1048	0	0	0	0	0	0
chrUn_KI270338v1	1	1428	0	0	0	0	0	0
chrUn_KI270340v1	1	1428	0	0	0	0	0	0
chrUn_KI270363v1	1	1803	0	0	0	0	0	0
chrUn_KI270364v1	1	2855	0	0	0	0	0	0
chrUn_KI270362v1	1	3530	0	0	0	0	0	0
chrUn_KI270366v1	1	8320	0	0	0	0	0	0
chrUn_KI270378v1	1	1048	0	0	0	0	0	0
chrUn_KI270379v1	1	1045	0	0	0	0	0	0
chrUn_KI270389v1	1	1298	0	0	0	0	0	0
chrUn_KI270387v1	1	1537	0	0	0	0	0	0
chrUn_KI270396v1	1	1880	0	0	0	0	0	0
chrUn_KI270388v1	1	1216	0	0	0	0	0	0
chrUn_KI270394v1	1	970	0	0	0	0	0	0
chrUn_KI270386v1	1	1788	0	0	0	0	0	0
chrUn_KI270391v1	1	1484	0	0	0	0	0	0
chrUn_KI270383v1	1	1750	0	0	0	0	0	0
chrUn_KI270393v1	1	1308	0	0	0	0	0	0
chrUn_KI270384v1	1	1658	0	0	0	0	0	0
chrUn_KI270392v1	1	971	0	0	0	0	0	0
chrUn_KI270381v1	1	1930	0	0	0	0	0	0
chrUn_KI270385v1	1	990	0	0	0	0	0	0
chrUn_KI270376v1	1	1136	0	0	0	0	0	0
chrUn_KI270374v1	1	2656	0	0	0	0	0	0
chrUn_KI270372v1	1	1650	0	0	0	0	0	0
chrUn_KI270373v1	1	1451	0	0	0	0	0	0
chrUn_KI270375v1	1	2378	0	0	0	0	0	0
chrUn_KI270371v1	1	2805	0	0	0	0	0	0
chrUn_KI270752v1	1	27745	0	0	0	0	0	0

## Sheet: PB_winnowmap2
#rname	startpos	endpos	numreads	covbases	coverage	meandepth	meanbaseq	meanmapq
chr1	1	248956422	397016	229941699	92.3622	20.002	81.7	57.7
chr2	1	242193529	385242	238872145	98.6286	20.1463	81.7	59.6
chr3	1	198295559	318464	197432022	99.5645	20.3575	81.8	59.5
chr4	1	190214555	341263	188846723	99.2809	21.8975	82	57.7
chr5	1	181538259	289697	178445009	98.2961	20.0655	81.8	59.5
chr6	1	170805979	276571	169493240	99.2314	20.4963	81.8	59.3
chr7	1	159345973	249955	157642220	98.9308	19.7686	81.6	59.3
chr8	1	145138636	232610	143829818	99.0982	20.272	81.7	59.3
chr9	1	138394717	189450	119482712	86.3347	17.2736	81.6	59.2
chr10	1	133797422	219897	132212361	98.8153	20.5247	81.6	58.5
chr11	1	135086622	212165	132741502	98.264	19.8105	81.6	59.5
chr12	1	133275309	210745	132417377	99.3563	19.9618	81.7	59.5
chr13	1	114364328	160109	97643445	85.3793	17.6178	81.8	58.7
chr14	1	107043718	145599	88402961	82.5858	16.9593	81.6	59.4
chr15	1	101991189	131703	83599482	81.9674	16.3303	81.6	59.3
chr16	1	90338345	141045	81420601	90.1285	19.4345	81.5	57.7
chr17	1	83257441	125937	79853755	95.9119	18.7767	81.2	57.4
chr18	1	80373285	125782	78659504	97.8677	19.7815	81.8	58.8
chr19	1	58617616	79911	55727325	95.0692	16.8926	80.9	59.4
chr20	1	64444167	104363	63170170	98.0231	20.1369	81.5	58.2
chr21	1	46709983	69733	37442712	80.16	18.2805	81.3	56.9
chr22	1	50818468	100628	36967601	72.7444	17.4726	81.4	51.1
chrX	1	156040895	123522	152950456	98.0195	9.98727	81.7	59.1
chrY	1	57227415	39740	23363731	40.8261	8.37289	82.3	45.1
chrM	1	16569	2544	16569	100	1202.19	81.8	60
chr1_KI270706v1_random	1	175055	347	175055	100	24.0436	81.5	54.2
chr1_KI270707v1_random	1	32032	43	32032	100	14.5816	82.6	60
chr1_KI270708v1_random	1	127682	178	127682	100	16.2131	83.4	47.9
chr1_KI270709v1_random	1	66860	3576	66860	100	612.94	83.3	44.3
chr1_KI270710v1_random	1	40176	71	40176	100	21.7614	83.6	55
chr1_KI270711v1_random	1	42210	218	42210	100	47.6492	80.8	56.2
chr1_KI270712v1_random	1	176043	219	133373	75.7616	11.6434	80.3	57.3
chr1_KI270713v1_random	1	40745	104	38313	94.0312	28.9002	82	57.3
chr1_KI270714v1_random	1	41717	66	41714	99.9928	16.7588	80.5	59.1
chr2_KI270715v1_random	1	161471	601	161464	99.9957	46.7742	81.9	40.1
chr2_KI270716v1_random	1	153799	443	152166	98.9382	35.8028	81.3	39.8
chr3_GL000221v1_random	1	155397	465	142446	91.6659	37.6623	80.8	53.1
chr4_GL000008v2_random	1	209709	1538	209694	99.9928	60.3035	82	47.4
chr5_GL000208v1_random	1	92689	296	92688	99.9989	35.7667	82.8	52.9
chr9_KI270717v1_random	1	40062	48	40062	100	14.0004	82.5	55.1
chr9_KI270718v1_random	1	38054	128	38050	99.9895	22.8267	83.6	47
chr9_KI270719v1_random	1	176845	497	176844	99.9994	34.0998	81.8	56.9
chr9_KI270720v1_random	1	39050	131	39050	100	37.4456	81.9	41.8
chr11_KI270721v1_random	1	100316	77	91309	91.0214	9.6921	79.3	54.4
chr14_GL000009v2_random	1	201709	1006	201709	100	60.26	82.1	53.5
chr14_GL000225v1_random	1	211173	6085	199949	94.6849	236.38	81.7	41.4
chr14_KI270722v1_random	1	194050	375	194050	100	21.8336	81.7	54
chr14_GL000194v1_random	1	191469	922	191451	99.9906	58.8284	81.5	56.7
chr14_KI270723v1_random	1	38115	183	38115	100	40.5085	81.3	53.6
chr14_KI270724v1_random	1	39555	168	39555	100	35.5589	82.3	52
chr14_KI270725v1_random	1	172810	335	172810	100	23.2486	81.3	57.3
chr15_KI270727v1_random	1	448248	174	207219	46.2287	4.87852	81.1	45.6
chr16_KI270728v1_random	1	1872759	1298	1501817	80.1928	7.61706	81.8	46.7
chr17_GL000205v2_random	1	185591	830	180359	97.1809	54.7942	82	56.5
chr17_KI270729v1_random	1	280839	1595	269505	95.9642	41.7936	82.8	48.7
chr17_KI270730v1_random	1	112551	494	103635	92.0783	30.2179	82.3	39.4
chr22_KI270731v1_random	1	150754	264	149787	99.3586	19.1015	81.1	43.2
chr22_KI270732v1_random	1	41543	276	41543	100	77.943	81.5	53.7
chr22_KI270733v1_random	1	179772	4563	179765	99.9961	308.098	77.4	51.6
chr22_KI270734v1_random	1	165050	1363	153641	93.0875	36.6577	81.6	27.3
chr22_KI270735v1_random	1	42811	390	42811	100	80.8762	83.4	49
chr22_KI270736v1_random	1	181920	3680	170180	93.5466	200.356	82.6	32.2
chr22_KI270737v1_random	1	103838	140	99329	95.6577	15.4505	81.8	32.9
chr22_KI270738v1_random	1	99375	272	96240	96.8453	27.4636	81.4	53.7
chr22_KI270739v1_random	1	73985	46	72833	98.4429	6.52681	83.4	53.6
chrY_KI270740v1_random	1	37240	45	36979	99.2991	13.3106	82.4	56.1
chrUn_KI270302v1	1	2274	1	2266	99.6482	0.996482	92.5	60
chrUn_KI270304v1	1	2165	3	1751	80.8776	2.11917	89.8	45.7
chrUn_KI270303v1	1	1942	1	775	39.9073	0.399073	89.4	14
chrUn_KI270322v1	1	21476	1	2013	9.37325	0.0937325	85.5	60
chrUn_KI270320v1	1	4416	46	4415	99.9774	42.697	89	53
chrUn_KI270310v1	1	1201	3	1198	99.7502	2.13489	77.1	33
chrUn_KI270315v1	1	2276	1	1886	82.8647	0.828647	75.6	60
chrUn_KI270311v1	1	12399	20	1387	11.1864	1.7074	87.5	40.9
chrUn_KI270414v1	1	2489	1	601	24.1462	0.241462	90.9	30
chrUn_KI270419v1	1	1029	1	1026	99.7085	0.997085	81.2	60
chrUn_KI270418v1	1	2145	1	1590	74.1259	0.741259	81.4	60
chrUn_KI270420v1	1	2321	1	2298	99.009	0.99009	91.6	30
chrUn_KI270429v1	1	1361	2	1361	100	1.88611	92.1	60
chrUn_KI270442v1	1	392061	2655	371787	94.8289	60.8884	82	53.8
chrUn_KI270466v1	1	1233	386	1233	100	329.084	82.1	59.3
chrUn_KI270465v1	1	1774	1	1324	74.6336	0.746336	92.7	60
chrUn_KI270467v1	1	3920	13963	3920	100	10547.5	82.2	55.1
chrUn_KI270435v1	1	92983	371	92962	99.9774	32.5432	81.5	52.3
chrUn_KI270438v1	1	112505	10797	84203	74.8438	876.276	82.6	39.5
chrUn_KI270468v1	1	4055	14	4055	100	9.50308	83.5	60
chrUn_KI270510v1	1	2415	38	2415	100	35.0348	79.1	39.5
chrUn_KI270509v1	1	2318	7	2318	100	6.5233	86.6	60
chrUn_KI270518v1	1	2186	19	2186	100	13.7708	79.3	56.9
chrUn_KI270508v1	1	1951	11	1951	100	10.652	81.5	60
chrUn_KI270516v1	1	1300	27	1300	100	26.7146	87	60
chrUn_KI270512v1	1	22689	90	22684	99.978	34.153	81.1	47.6
chrUn_KI270519v1	1	138126	649	136248	98.6404	46.7204	81.7	46.1
chrUn_KI270522v1	1	5674	12	5674	100	9.65862	73.2	60
chrUn_KI270511v1	1	8127	28	8123	99.9508	20.3811	85.9	57.9
chrUn_KI270515v1	1	6361	34	6359	99.9686	29.4245	82.6	58.3
chrUn_KI270507v1	1	5353	12	5353	100	8.04315	82.4	58.7
chrUn_KI270517v1	1	3253	14	3253	100	11.5905	79.2	55.7
chrUn_KI270530v1	1	2168	1	2162	99.7232	0.997232	55.7	60
chrUn_KI270538v1	1	91309	680	64246	70.3611	41.9784	81.3	54.5
chrUn_KI270583v1	1	1400	1	821	58.6429	0.586429	76.8	60
chrUn_KI270587v1	1	2969	18	2969	100	13.1071	87.8	59.4
chrUn_KI270581v1	1	7046	1	7028	99.7445	0.997445	67.6	60
chrUn_KI270579v1	1	31033	40	29719	95.7658	13.5522	86.6	40.9
chrUn_KI270589v1	1	44474	195	34889	78.4481	20.8046	82.2	53.6
chrUn_KI270590v1	1	4685	63	4684	99.9787	54.755	82.5	53.4
chrUn_KI270584v1	1	4513	40	4513	100	25.1442	79.9	60
chrUn_KI270582v1	1	6504	34	6504	100	20.2251	81.8	60
chrUn_KI270588v1	1	6158	43	6155	99.9513	31.0461	86	58.6
chrUn_KI270591v1	1	5796	99	5796	100	69.7048	83.7	52.3
chrUn_KI270329v1	1	1040	1	1034	99.4231	0.994231	35.6	60
chrUn_KI270333v1	1	2699	6790	2699	100	6164.6	83.1	54.6
chrUn_KI270336v1	1	1026	27	1026	100	19.076	85.5	25
chrUn_KI270337v1	1	1121	39	1121	100	31.3113	85	28.1
chrUn_KI270448v1	1	7992	37	7992	100	27.9371	84.1	60
chrUn_KI270521v1	1	7642	18	7642	100	12.9639	80.1	55.8
chrUn_GL000195v1	1	182896	854	181857	99.4319	59.3759	82.1	58.2
chrUn_GL000219v1	1	179198	490	179198	100	28.2807	80.9	56.7
chrUn_GL000220v1	1	161802	3682	152151	94.0353	280.736	77.6	48
chrUn_GL000224v1	1	179693	1721	179693	100	104.168	81.5	51.1
chrUn_KI270741v1	1	157432	123	148503	94.3283	8.63169	83.4	49.6
chrUn_GL000226v1	1	15008	4783	15008	100	3565.27	82.6	45.1
chrUn_GL000213v1	1	164239	71	117705	71.6669	5.17215	81.5	55.7
chrUn_KI270743v1	1	210658	553	210658	100	30.6986	81.3	56.6
chrUn_KI270744v1	1	168472	2429	167687	99.534	91.0162	81.6	56.3
chrUn_KI270745v1	1	41891	23	41890	99.9976	6.02134	86.8	52.8
chrUn_KI270746v1	1	66486	331	66484	99.997	58.1794	82.8	59.2
chrUn_KI270747v1	1	198735	168	195299	98.2711	9.53905	82.3	46.3
chrUn_KI270748v1	1	93321	49	72852	78.066	5.51596	82.7	44.2
chrUn_KI270749v1	1	158759	369	158759	100	28.6013	82.4	59.5
chrUn_KI270750v1	1	148850	452	148850	100	37.9437	82.1	57.3
chrUn_KI270751v1	1	150742	800	135603	89.957	59.0339	81.6	45.9
chrUn_KI270753v1	1	62944	134	62587	99.4328	26.4641	83.1	56.5
chrUn_KI270754v1	1	40191	206	40191	100	58.232	80.3	43.7
chrUn_KI270755v1	1	36723	26	36723	100	8.72982	82.9	57.7
chrUn_KI270756v1	1	79590	162	76777	96.4656	19.9801	80.7	46.6
chrUn_KI270757v1	1	71251	863	61849	86.8044	85.87	81.4	50.4
chrUn_GL000214v1	1	137718	996	121434	88.1758	85.566	80.9	42.2
chrUn_KI270742v1	1	186739	854	186739	100	55.8772	81.1	53.3
chrUn_GL000216v2	1	176608	1901	176608	100	95.1584	82.1	40.9
chrUn_GL000218v1	1	161147	524	161147	100	41.32	82	58.4
chrEBV	1	171823	2954	159996	93.1168	183.285	79.9	54.4
chr14_KI270726v1_random	1	43739	0	0	0	0	0	0
chrUn_KI270305v1	1	1472	0	0	0	0	0	0
chrUn_KI270316v1	1	1444	0	0	0	0	0	0
chrUn_KI270312v1	1	998	0	0	0	0	0	0
chrUn_KI270317v1	1	37690	0	0	0	0	0	0
chrUn_KI270412v1	1	1179	0	0	0	0	0	0
chrUn_KI270411v1	1	2646	0	0	0	0	0	0
chrUn_KI270424v1	1	2140	0	0	0	0	0	0
chrUn_KI270417v1	1	2043	0	0	0	0	0	0
chrUn_KI270422v1	1	1445	0	0	0	0	0	0
chrUn_KI270423v1	1	981	0	0	0	0	0	0
chrUn_KI270425v1	1	1884	0	0	0	0	0	0
chrUn_KI270529v1	1	1899	0	0	0	0	0	0
chrUn_KI270528v1	1	2983	0	0	0	0	0	0
chrUn_KI270539v1	1	993	0	0	0	0	0	0
chrUn_KI270544v1	1	1202	0	0	0	0	0	0
chrUn_KI270548v1	1	1599	0	0	0	0	0	0
chrUn_KI270580v1	1	1553	0	0	0	0	0	0
chrUn_KI270593v1	1	3041	0	0	0	0	0	0
chrUn_KI270330v1	1	1652	0	0	0	0	0	0
chrUn_KI270334v1	1	1368	0	0	0	0	0	0
chrUn_KI270335v1	1	1048	0	0	0	0	0	0
chrUn_KI270338v1	1	1428	0	0	0	0	0	0
chrUn_KI270340v1	1	1428	0	0	0	0	0	0
chrUn_KI270363v1	1	1803	0	0	0	0	0	0
chrUn_KI270364v1	1	2855	0	0	0	0	0	0
chrUn_KI270362v1	1	3530	0	0	0	0	0	0
chrUn_KI270366v1	1	8320	0	0	0	0	0	0
chrUn_KI270378v1	1	1048	0	0	0	0	0	0
chrUn_KI270379v1	1	1045	0	0	0	0	0	0
chrUn_KI270389v1	1	1298	0	0	0	0	0	0
chrUn_KI270390v1	1	2387	0	0	0	0	0	0
chrUn_KI270387v1	1	1537	0	0	0	0	0	0
chrUn_KI270395v1	1	1143	0	0	0	0	0	0
chrUn_KI270396v1	1	1880	0	0	0	0	0	0
chrUn_KI270388v1	1	1216	0	0	0	0	0	0
chrUn_KI270394v1	1	970	0	0	0	0	0	0
chrUn_KI270386v1	1	1788	0	0	0	0	0	0
chrUn_KI270391v1	1	1484	0	0	0	0	0	0
chrUn_KI270383v1	1	1750	0	0	0	0	0	0
chrUn_KI270393v1	1	1308	0	0	0	0	0	0
chrUn_KI270384v1	1	1658	0	0	0	0	0	0
chrUn_KI270392v1	1	971	0	0	0	0	0	0
chrUn_KI270381v1	1	1930	0	0	0	0	0	0
chrUn_KI270385v1	1	990	0	0	0	0	0	0
chrUn_KI270382v1	1	4215	0	0	0	0	0	0
chrUn_KI270376v1	1	1136	0	0	0	0	0	0
chrUn_KI270374v1	1	2656	0	0	0	0	0	0
chrUn_KI270372v1	1	1650	0	0	0	0	0	0
chrUn_KI270373v1	1	1451	0	0	0	0	0	0
chrUn_KI270375v1	1	2378	0	0	0	0	0	0
chrUn_KI270371v1	1	2805	0	0	0	0	0	0
chrUn_KI270752v1	1	27745	0	0	0	0	0	0

## Sheet: PB_ngmlr
#rname	startpos	endpos	numreads	covbases	coverage	meandepth	meanbaseq	meanmapq
chr1	1	248956422	361279	226888546	91.1358	17.9711	81.6	56.8
chr2	1	242193529	391749	239061850	98.707	19.9393	81.7	56.8
chr3	1	198295559	316664	195804492	98.7438	20.0446	81.8	58.7
chr4	1	190214555	311633	187711993	98.6843	20.1254	81.9	57.4
chr5	1	181538259	293957	177215274	97.6187	19.7821	81.8	57
chr6	1	170805979	273058	168541143	98.674	19.9745	81.8	58.5
chr7	1	159345973	248311	155817738	97.7858	19.3123	81.6	57
chr8	1	145138636	229218	142493380	98.1774	19.7645	81.7	58.3
chr9	1	138394717	184898	118205976	85.4122	16.5087	81.6	55.6
chr10	1	133797422	213950	131271798	98.1124	19.4999	81.6	56.7
chr11	1	135086622	214691	132571200	98.1379	19.4349	81.6	57.5
chr12	1	133275309	209593	130811075	98.151	19.6137	81.7	58.6
chr13	1	114364328	156505	96252012	84.1626	16.9585	81.8	58
chr14	1	107043718	142544	88412623	82.5949	16.6225	81.6	57.9
chr15	1	101991189	129164	81597861	80.0048	15.7467	81.6	56.4
chr16	1	90338345	170713	79485271	87.9862	18.1335	81.4	43.1
chr17	1	83257441	134708	78911661	94.7803	18.0519	81.2	51.5
chr18	1	80373285	122415	75844182	94.3649	18.8198	81.7	57.5
chr19	1	58617616	80516	55636822	94.9148	16.5895	80.9	57.5
chr20	1	64444167	110135	61583262	95.5606	19.0343	81.4	54.2
chr21	1	46709983	68585	36858541	78.9093	16.8995	81.4	49.4
chr22	1	50818468	57738	36849160	72.5114	13.3346	81.1	52.2
chrX	1	156040895	121328	150571952	96.4952	9.73401	81.7	57
chrY	1	57227415	23955	21743373	37.9947	3.85465	81.8	33.5
chrM	1	16569	2660	16569	100	1203.67	81.8	47.1
chr1_KI270706v1_random	1	175055	296	175055	100	19.9287	81.3	12.7
chr1_KI270707v1_random	1	32032	53	32032	100	14.9768	82.1	16.1
chr1_KI270708v1_random	1	127682	148	127681	99.9992	12.3431	83.3	20.7
chr1_KI270709v1_random	1	66860	423	66835	99.9626	44.1321	82.8	22.7
chr1_KI270710v1_random	1	40176	70	40176	100	14.3368	81.9	17.6
chr1_KI270711v1_random	1	42210	146	42210	100	29.4961	82.4	5.03
chr1_KI270712v1_random	1	176043	349	102676	58.3244	7.51244	81.8	25.2
chr1_KI270713v1_random	1	40745	181	38315	94.0361	33.374	82	15.9
chr1_KI270714v1_random	1	41717	85	41715	99.9952	18.7105	81.4	10.8
chr2_KI270715v1_random	1	161471	197	147047	91.0671	7.0877	80.3	8.53
chr2_KI270716v1_random	1	153799	126	76156	49.5166	5.7771	80.8	16
chr3_GL000221v1_random	1	155397	132	134510	86.5589	7.67517	77.7	3.52
chr4_GL000008v2_random	1	209709	1733	209698	99.9948	37.2561	81.6	26.4
chr5_GL000208v1_random	1	92689	248	91041	98.222	22.6173	82	30.9
chr9_KI270717v1_random	1	40062	21	35801	89.364	4.97863	81	4.24
chr9_KI270718v1_random	1	38054	119	17900	47.0384	10.9405	84.2	16.9
chr9_KI270719v1_random	1	176845	504	176843	99.9989	29.8835	81.2	11.5
chr9_KI270720v1_random	1	39050	152	39050	100	26.8929	82	34.7
chr11_KI270721v1_random	1	100316	63	97363	97.0563	7.76538	76.4	4.21
chr14_GL000009v2_random	1	201709	755	201709	100	37.656	81.2	10.4
chr14_GL000225v1_random	1	211173	1238	200754	95.0661	25.8932	81.6	23.2
chr14_KI270722v1_random	1	194050	362	194048	99.999	18.1776	81.3	29.7
chr14_GL000194v1_random	1	191469	820	191450	99.9901	47.5337	81.2	12.5
chr14_KI270723v1_random	1	38115	161	38115	100	38.0396	82.1	24.8
chr14_KI270724v1_random	1	39555	201	39555	100	35.7194	82.8	18.7
chr14_KI270725v1_random	1	172810	362	171433	99.2032	21.4799	81.5	15.2
chr15_KI270727v1_random	1	448248	108	224023	49.9775	2.47919	79.7	3.9
chr16_KI270728v1_random	1	1872759	1023	1175750	62.7817	4.289	80.2	12.1
chr17_GL000205v2_random	1	185591	932	182515	98.3426	48.3734	82.3	35.6
chr17_KI270729v1_random	1	280839	3997	269462	95.9489	36.9435	82.6	37
chr17_KI270730v1_random	1	112551	1031	106693	94.7952	21.7456	82.3	28.4
chr22_KI270731v1_random	1	150754	84	100768	66.8427	5.32318	80.5	4.7
chr22_KI270732v1_random	1	41543	343	41542	99.9976	70.434	80.7	25.9
chr22_KI270733v1_random	1	179772	2066	166644	92.6974	96.1731	77.8	8.59
chr22_KI270734v1_random	1	165050	94	135228	81.9315	4.84092	79.3	6.1
chr22_KI270735v1_random	1	42811	535	42811	100	67.9946	82.7	26.9
chr22_KI270736v1_random	1	181920	2198	169667	93.2646	31.778	82.5	35.2
chr22_KI270737v1_random	1	103838	124	89538	86.2285	9.11607	83.2	23.4
chr22_KI270738v1_random	1	99375	300	96619	97.2267	20.8088	82.1	39.5
chr22_KI270739v1_random	1	73985	86	70812	95.7113	7.22603	76.6	17.5
chrY_KI270740v1_random	1	37240	62	36975	99.2884	12.0644	81.8	15.5
chrUn_KI270322v1	1	21476	43	4179	19.4589	3.89258	80	13.3
chrUn_KI270320v1	1	4416	67	4414	99.9547	51.3897	81.6	14.1
chrUn_KI270315v1	1	2276	17	2262	99.3849	13.6098	81	24.7
chrUn_KI270311v1	1	12399	44	2965	23.9132	5.3289	83.1	34.2
chrUn_KI270317v1	1	37690	1	841	2.23136	0.0223136	72.1	15
chrUn_KI270419v1	1	1029	26	1027	99.8056	21.6511	82.3	20.7
chrUn_KI270418v1	1	2145	23	2145	100	21.4005	83.7	15.3
chrUn_KI270420v1	1	2321	37	2321	100	21.9629	84.8	28.6
chrUn_KI270424v1	1	2140	4	926	43.271	1.06963	88.2	20
chrUn_KI270417v1	1	2043	13	2043	100	12.1116	80.8	42.9
chrUn_KI270422v1	1	1445	74	1443	99.8616	71.0152	82.1	20.9
chrUn_KI270423v1	1	981	3	978	99.6942	1.37717	88.5	56
chrUn_KI270429v1	1	1361	83	1361	100	75.047	86.1	25.3
chrUn_KI270442v1	1	392061	3778	373003	95.139	49.8847	81.7	35.1
chrUn_KI270466v1	1	1233	3871	1233	100	1652.77	82.3	41.9
chrUn_KI270465v1	1	1774	201	1774	100	177.054	80.1	13.4
chrUn_KI270467v1	1	3920	17630	3920	100	6573.23	82.3	42.8
chrUn_KI270435v1	1	92983	594	92921	99.9333	32.2094	81.8	31.3
chrUn_KI270438v1	1	112505	50266	84612	75.2073	792.978	82.6	21
chrUn_KI270468v1	1	4055	32	4055	100	25.7105	79.2	35.9
chrUn_KI270510v1	1	2415	113	2415	100	60.9549	80.7	37.1
chrUn_KI270509v1	1	2318	90	2318	100	56.1842	82.7	36.8
chrUn_KI270518v1	1	2186	75	2186	100	63.3774	82.1	32.6
chrUn_KI270508v1	1	1951	122	1951	100	117.608	81.6	41.6
chrUn_KI270516v1	1	1300	99	1300	100	59.45	84.5	44.3
chrUn_KI270512v1	1	22689	109	22571	99.4799	26.3767	81	30.5
chrUn_KI270519v1	1	138126	1657	126992	91.9392	47.7787	82.1	32.3
chrUn_KI270522v1	1	5674	26	5674	100	21.6992	80	31.3
chrUn_KI270511v1	1	8127	67	8126	99.9877	34.1666	84.6	36.7
chrUn_KI270515v1	1	6361	172	6360	99.9843	78.3375	81.4	35
chrUn_KI270507v1	1	5353	169	5353	100	84.7956	82	34.9
chrUn_KI270517v1	1	3253	144	3253	100	99.7608	82.1	34.9
chrUn_KI270529v1	1	1899	4	1547	81.4639	2.62454	72.3	22.2
chrUn_KI270530v1	1	2168	2	930	42.8967	0.637915	88.8	37.5
chrUn_KI270539v1	1	993	4	313	31.5206	0.487412	83.6	30.8
chrUn_KI270538v1	1	91309	1194	63261	69.2823	36.9114	80.9	23.4
chrUn_KI270583v1	1	1400	72	1400	100	48.4457	81.5	23.7
chrUn_KI270587v1	1	2969	115	2969	100	85.512	84.5	31.6
chrUn_KI270580v1	1	1553	73	1553	100	69.103	80.6	30.3
chrUn_KI270581v1	1	7046	1	5308	75.3335	0.753335	61.7	9
chrUn_KI270579v1	1	31033	8	17796	57.3454	1.21696	90.8	5.75
chrUn_KI270589v1	1	44474	462	33412	75.127	24.1837	80.9	29.8
chrUn_KI270590v1	1	4685	256	4684	99.9787	104.421	83.2	33.6
chrUn_KI270584v1	1	4513	143	4513	100	81.9439	81.7	24.8
chrUn_KI270582v1	1	6504	2	6497	99.8924	1.99154	59.3	9.5
chrUn_KI270588v1	1	6158	84	6154	99.935	53.8347	84.8	32.3
chrUn_KI270593v1	1	3041	54	3041	100	41.9701	79.4	48
chrUn_KI270591v1	1	5796	337	5796	100	97.1793	83.5	30.9
chrUn_KI270330v1	1	1652	25	1652	100	21.2542	81.4	6.12
chrUn_KI270333v1	1	2699	196	2699	100	130.203	80.8	12.7
chrUn_KI270336v1	1	1026	19	1026	100	17.8558	86	27.3
chrUn_KI270337v1	1	1121	52	1121	100	50.0598	82.1	13.1
chrUn_KI270363v1	1	1803	9	1796	99.6118	2.25846	83.9	33.8
chrUn_KI270362v1	1	3530	17	3530	100	9.33569	80.7	17.8
chrUn_KI270366v1	1	8320	7	8085	97.1755	3.74147	83.9	9.57
chrUn_KI270386v1	1	1788	8	1788	100	7.9726	81.1	11.9
chrUn_KI270382v1	1	4215	11	4204	99.739	7.59454	79.9	15
chrUn_KI270448v1	1	7992	61	7992	100	36.9605	81.5	32.1
chrUn_KI270521v1	1	7642	36	7642	100	20.3414	80.7	27.5
chrUn_GL000195v1	1	182896	559	181877	99.4429	30.4848	82.6	9.87
chrUn_GL000219v1	1	179198	645	175579	97.9804	26.381	80.5	36.3
chrUn_GL000220v1	1	161802	1561	145737	90.0712	73.9326	77.7	3.37
chrUn_GL000224v1	1	179693	1462	179692	99.9994	57.8446	80.9	12.5
chrUn_KI270741v1	1	157432	116	141145	89.6546	5.8883	80.3	9.53
chrUn_GL000213v1	1	164239	52	102280	62.2751	3.20501	82.2	6.79
chrUn_KI270743v1	1	210658	478	210658	100	25.1487	81.8	8.27
chrUn_KI270744v1	1	168472	956	167688	99.5346	32.2944	81.5	16.4
chrUn_KI270745v1	1	41891	26	26652	63.6223	4.88964	85.1	3.35
chrUn_KI270746v1	1	66486	479	66485	99.9985	63.2595	82.7	25.9
chrUn_KI270747v1	1	198735	173	135286	68.0736	4.6932	79.5	13
chrUn_KI270748v1	1	93321	6	21937	23.507	0.347639	86.5	2.17
chrUn_KI270749v1	1	158759	390	158759	100	27.9055	82.6	11.7
chrUn_KI270750v1	1	148850	465	148850	100	34.4194	81.5	23.1
chrUn_KI270751v1	1	150742	745	148401	98.447	43.1877	81.4	22.4
chrUn_KI270753v1	1	62944	133	62582	99.4249	20.2428	80.5	4.85
chrUn_KI270754v1	1	40191	158	40190	99.9975	23.6437	79.8	8.74
chrUn_KI270755v1	1	36723	23	35578	96.8821	6.34134	82.9	8.61
chrUn_KI270756v1	1	79590	361	79348	99.6959	17.0024	80.8	23.5
chrUn_KI270757v1	1	71251	1306	61851	86.8072	62.6879	81.5	29.2
chrUn_GL000214v1	1	137718	319	137697	99.9848	20.7941	79.1	5.59
chrUn_KI270742v1	1	186739	503	180373	96.591	28.4035	80.5	5.79
chrUn_GL000216v2	1	176608	1545	176395	99.8794	31.8425	82.4	26.4
chrUn_GL000218v1	1	161147	544	161147	100	37.9038	82	10.8
chrEBV	1	171823	2767	159996	93.1168	162.775	79.9	52.2
chr14_KI270726v1_random	1	43739	0	0	0	0	0	0
chrUn_KI270302v1	1	2274	0	0	0	0	0	0
chrUn_KI270304v1	1	2165	0	0	0	0	0	0
chrUn_KI270303v1	1	1942	0	0	0	0	0	0
chrUn_KI270305v1	1	1472	0	0	0	0	0	0
chrUn_KI270310v1	1	1201	0	0	0	0	0	0
chrUn_KI270316v1	1	1444	0	0	0	0	0	0
chrUn_KI270312v1	1	998	0	0	0	0	0	0
chrUn_KI270412v1	1	1179	0	0	0	0	0	0
chrUn_KI270411v1	1	2646	0	0	0	0	0	0
chrUn_KI270414v1	1	2489	0	0	0	0	0	0
chrUn_KI270425v1	1	1884	0	0	0	0	0	0
chrUn_KI270528v1	1	2983	0	0	0	0	0	0
chrUn_KI270544v1	1	1202	0	0	0	0	0	0
chrUn_KI270548v1	1	1599	0	0	0	0	0	0
chrUn_KI270329v1	1	1040	0	0	0	0	0	0
chrUn_KI270334v1	1	1368	0	0	0	0	0	0
chrUn_KI270335v1	1	1048	0	0	0	0	0	0
chrUn_KI270338v1	1	1428	0	0	0	0	0	0
chrUn_KI270340v1	1	1428	0	0	0	0	0	0
chrUn_KI270364v1	1	2855	0	0	0	0	0	0
chrUn_KI270378v1	1	1048	0	0	0	0	0	0
chrUn_KI270379v1	1	1045	0	0	0	0	0	0
chrUn_KI270389v1	1	1298	0	0	0	0	0	0
chrUn_KI270390v1	1	2387	0	0	0	0	0	0
chrUn_KI270387v1	1	1537	0	0	0	0	0	0
chrUn_KI270395v1	1	1143	0	0	0	0	0	0
chrUn_KI270396v1	1	1880	0	0	0	0	0	0
chrUn_KI270388v1	1	1216	0	0	0	0	0	0
chrUn_KI270394v1	1	970	0	0	0	0	0	0
chrUn_KI270391v1	1	1484	0	0	0	0	0	0
chrUn_KI270383v1	1	1750	0	0	0	0	0	0
chrUn_KI270393v1	1	1308	0	0	0	0	0	0
chrUn_KI270384v1	1	1658	0	0	0	0	0	0
chrUn_KI270392v1	1	971	0	0	0	0	0	0
chrUn_KI270381v1	1	1930	0	0	0	0	0	0
chrUn_KI270385v1	1	990	0	0	0	0	0	0
chrUn_KI270376v1	1	1136	0	0	0	0	0	0
chrUn_KI270374v1	1	2656	0	0	0	0	0	0
chrUn_KI270372v1	1	1650	0	0	0	0	0	0
chrUn_KI270373v1	1	1451	0	0	0	0	0	0
chrUn_KI270375v1	1	2378	0	0	0	0	0	0
chrUn_KI270371v1	1	2805	0	0	0	0	0	0
chrUn_GL000226v1	1	15008	0	0	0	0	0	0
chrUn_KI270752v1	1	27745	0	0	0	0	0	0

## Sheet: PB_lra
#rname	startpos	endpos	numreads	covbases	coverage	meandepth	meanbaseq	meanmapq
chr1	1	248956422	383496	228515473	91.7893	19.0627	82.5	59.1
chr2	1	242193529	383447	239141148	98.7397	20.0613	82.5	59.6
chr3	1	198295559	324854	196280926	98.984	20.1303	82.6	59.6
chr4	1	190214555	320241	188602968	99.1528	20.4284	82.7	59
chr5	1	181538259	290369	178329193	98.2323	20.0292	82.6	59.3
chr6	1	170805979	269135	168747841	98.795	19.9858	82.6	59.9
chr7	1	159345973	246401	156397798	98.1498	19.5124	82.4	59.2
chr8	1	145138636	231948	143005346	98.5302	20.0067	82.6	59.3
chr9	1	138394717	187627	119344898	86.2352	17.085	82.4	58.5
chr10	1	133797422	214823	131442342	98.2398	19.8087	82.4	59.4
chr11	1	135086622	208616	132406641	98.0161	19.5361	82.4	59.5
chr12	1	133275309	206843	131136628	98.3953	19.6294	82.6	59.9
chr13	1	114364328	161537	97510220	85.2628	17.5257	82.6	57.6
chr14	1	107043718	142337	88413991	82.5962	16.815	82.4	59.3
chr15	1	101991189	129992	82393526	80.7849	16.0919	82.4	58.8
chr16	1	90338345	142875	80511651	89.1223	18.4585	82.2	58.6
chr17	1	83257441	120000	79218085	95.1484	18.0451	82	59
chr18	1	80373285	132584	77161532	96.004	19.4328	82.6	58.5
chr19	1	58617616	79050	55724768	95.0649	16.8558	81.7	59.2
chr20	1	64444167	101982	61874535	96.0126	19.34	82.2	58.9
chr21	1	46709983	68403	37591802	80.4792	18.0549	82.2	56
chr22	1	50818468	58322	36952114	72.7139	13.9854	81.9	57.7
chrX	1	156040895	121812	152356746	97.639	9.8603	82.5	58.9
chrY	1	57227415	40872	23445925	40.9697	7.94848	83.3	29.5
chrM	1	16569	1618	16569	100	1010.03	82.3	60
chr1_KI270706v1_random	1	175055	361	175055	100	23.7634	81.5	58.9
chr1_KI270707v1_random	1	32032	52	32032	100	16.017	86.1	60
chr1_KI270708v1_random	1	127682	129	127623	99.9538	11.8543	83.6	60
chr1_KI270709v1_random	1	66860	4408	66860	100	651.912	84.5	50.4
chr1_KI270710v1_random	1	40176	104	40176	100	28.4712	82.7	54.9
chr1_KI270711v1_random	1	42210	199	42210	100	43.6982	81	54.7
chr1_KI270712v1_random	1	176043	275	135732	77.1016	10.4927	82.5	53.9
chr1_KI270713v1_random	1	40745	139	40734	99.973	36.5721	84.1	60
chr1_KI270714v1_random	1	41717	72	40849	97.9193	17.3136	82.2	49.1
chr2_KI270715v1_random	1	161471	157	156130	96.6923	10.1185	81.9	54.4
chr2_KI270716v1_random	1	153799	136	96693	62.8697	9.00804	81	49.4
chr3_GL000221v1_random	1	155397	481	155250	99.9054	37.6918	82	32
chr4_GL000008v2_random	1	209709	1354	209694	99.9928	44.6856	83.5	54.2
chr5_GL000208v1_random	1	92689	236	92687	99.9978	26.6014	82.1	60
chr9_KI270717v1_random	1	40062	51	40062	100	14.2543	84.8	43.3
chr9_KI270718v1_random	1	38054	201	37510	98.5705	39.0245	83.8	54
chr9_KI270719v1_random	1	176845	543	176844	99.9994	35.7238	82.8	48
chr9_KI270720v1_random	1	39050	129	39050	100	30.349	82.1	59.1
chr11_KI270721v1_random	1	100316	75	85385	85.116	9.45664	78.8	46.6
chr14_GL000009v2_random	1	201709	1053	201709	100	61.3786	83.1	52.7
chr14_GL000225v1_random	1	211173	1668	200505	94.9482	46.304	82.5	51
chr14_KI270722v1_random	1	194050	377	194050	100	21.6438	82.2	58.5
chr14_GL000194v1_random	1	191469	1067	191451	99.9906	64.672	82.3	55.2
chr14_KI270723v1_random	1	38115	175	38115	100	42.7866	81.8	59.7
chr14_KI270724v1_random	1	39555	206	39555	100	41.9301	83.8	59.7
chr14_KI270725v1_random	1	172810	357	172810	100	24.4124	82.6	58.1
chr15_KI270727v1_random	1	448248	178	259242	57.8345	4.9133	81.1	35.4
chr16_KI270728v1_random	1	1872759	1495	1485876	79.3415	8.811	82.4	41.3
chr17_GL000205v2_random	1	185591	786	178814	96.3484	49.101	82.9	51.8
chr17_KI270729v1_random	1	280839	1724	270900	96.461	27.3616	83.1	54.2
chr17_KI270730v1_random	1	112551	571	99937	88.7926	20.4705	83.1	49.1
chr22_KI270731v1_random	1	150754	644	150701	99.9648	23.5994	85.3	23.1
chr22_KI270732v1_random	1	41543	363	41543	100	89.1017	81.3	60
chr22_KI270733v1_random	1	179772	3510	178852	99.4882	228.86	78.1	33
chr22_KI270734v1_random	1	165050	5412	157694	95.5432	128.475	85.5	2.47
chr22_KI270735v1_random	1	42811	324	42811	100	67.5818	83	53.4
chr22_KI270736v1_random	1	181920	1906	181912	99.9956	39.3528	83	31.6
chr22_KI270737v1_random	1	103838	132	103207	99.3923	12.6385	85.8	39.8
chr22_KI270738v1_random	1	99375	340	98584	99.204	31.4728	82	55
chr22_KI270739v1_random	1	73985	55	66292	89.6019	6.46993	83.2	47.9
chrY_KI270740v1_random	1	37240	55	37105	99.6375	13.4585	81.3	58.9
chrUn_KI270302v1	1	2274	14	2268	99.7361	10.0633	89.2	60
chrUn_KI270303v1	1	1942	2	1532	78.8877	1.19104	80.1	3
chrUn_KI270305v1	1	1472	6	794	53.9402	2.80299	68.3	40.3
chrUn_KI270322v1	1	21476	20	3540	16.4835	1.46834	79.3	42
chrUn_KI270320v1	1	4416	558	4416	100	539.373	84.5	59.7
chrUn_KI270315v1	1	2276	9	1913	84.051	6.69464	108	60
chrUn_KI270311v1	1	12399	41	2840	22.9051	4.53722	82.1	55.7
chrUn_KI270411v1	1	2646	67	2394	90.4762	53.3212	87	2.19
chrUn_KI270419v1	1	1029	30	956	92.9057	26.2225	84.9	60
chrUn_KI270418v1	1	2145	29	2096	97.7156	25.4816	82.2	60
chrUn_KI270420v1	1	2321	69	2320	99.9569	57.4162	87.1	60
chrUn_KI270417v1	1	2043	19	2043	100	16.9946	80.7	60
chrUn_KI270422v1	1	1445	97	1405	97.2318	88.5952	80.7	59.8
chrUn_KI270423v1	1	981	160	928	94.5973	128.266	83.4	59.8
chrUn_KI270425v1	1	1884	4	670	35.5626	1.24522	74.5	60
chrUn_KI270429v1	1	1361	47	1361	100	42.6708	87.2	60
chrUn_KI270442v1	1	392061	2792	391619	99.8873	54.9885	82.2	56.3
chrUn_KI270466v1	1	1233	566	1233	100	302.41	81.9	49.8
chrUn_KI270465v1	1	1774	195	1722	97.0688	162.818	82.7	59.7
chrUn_KI270467v1	1	3920	1065	3920	100	309.584	83.2	58.8
chrUn_KI270435v1	1	92983	471	92962	99.9774	32.4259	82.7	47.4
chrUn_KI270438v1	1	112505	48362	89558	79.6036	934.333	83.2	60
chrUn_KI270468v1	1	4055	32	4012	98.9396	25.4969	80	60
chrUn_KI270510v1	1	2415	56	2415	100	47.7776	85.1	60
chrUn_KI270509v1	1	2318	75	2231	96.2468	61.9456	81.4	60
chrUn_KI270518v1	1	2186	68	2186	100	60.2438	85.3	60
chrUn_KI270508v1	1	1951	121	1951	100	115.985	82.9	60
chrUn_KI270516v1	1	1300	25	1300	100	24.5208	85.9	60
chrUn_KI270512v1	1	22689	100	21990	96.9192	28.102	81.3	57.4
chrUn_KI270519v1	1	138126	898	132964	96.2628	45.5167	82.7	58.9
chrUn_KI270522v1	1	5674	27	5540	97.6384	21.4755	80.1	60
chrUn_KI270511v1	1	8127	123	8127	100	47.2855	86.6	60
chrUn_KI270515v1	1	6361	117	6360	99.9843	72.3042	82.1	60
chrUn_KI270507v1	1	5353	89	5353	100	64.0176	81.6	60
chrUn_KI270517v1	1	3253	122	3253	100	106.313	84.7	60
chrUn_KI270529v1	1	1899	25	1899	100	22.6056	86.8	60
chrUn_KI270530v1	1	2168	8	2168	100	7.29197	77.2	60
chrUn_KI270538v1	1	91309	860	80919	88.6211	43.2573	82.7	59.5
chrUn_KI270544v1	1	1202	7	1080	89.8502	4.6381	113	42.9
chrUn_KI270583v1	1	1400	10	1400	100	8.94571	83.4	60
chrUn_KI270587v1	1	2969	83	2969	100	68.4072	85.1	56.4
chrUn_KI270580v1	1	1553	3	1553	100	2.68706	78.4	40.3
chrUn_KI270581v1	1	7046	8	7046	100	5.65754	77.7	60
chrUn_KI270579v1	1	31033	45	30915	99.6198	13.4187	81.9	46.6
chrUn_KI270589v1	1	44474	350	30990	69.6812	23.7547	86	57.3
chrUn_KI270590v1	1	4685	154	4685	100	124.784	82.6	57.1
chrUn_KI270584v1	1	4513	102	4513	100	74.4339	81.6	60
chrUn_KI270582v1	1	6504	41	6445	99.0929	24.3722	85	60
chrUn_KI270588v1	1	6158	66	6158	100	48.3337	85.3	60
chrUn_KI270593v1	1	3041	24	3041	100	20.8675	80.5	60
chrUn_KI270591v1	1	5796	188	5796	100	120.406	83.1	30.8
chrUn_KI270330v1	1	1652	1	1320	79.9031	0.799031	92.7	60
chrUn_KI270333v1	1	2699	3217	2699	100	887.575	83.9	59.9
chrUn_KI270337v1	1	1121	13	943	84.1213	6.60482	84	54.2
chrUn_KI270362v1	1	3530	2	3163	89.6034	1.76572	81.4	60
chrUn_KI270366v1	1	8320	7	8191	98.4495	4.44928	87.8	60
chrUn_KI270395v1	1	1143	13	634	55.4681	5.45757	85.3	1
chrUn_KI270392v1	1	971	1	471	48.5067	0.485067	68.9	1
chrUn_KI270382v1	1	4215	11	3483	82.6335	6.907	79.9	60
chrUn_KI270448v1	1	7992	64	7992	100	40.2491	84.8	60
chrUn_KI270521v1	1	7642	32	7642	100	19.7901	80.9	60
chrUn_GL000195v1	1	182896	607	182809	99.9524	42.3488	83.1	47.5
chrUn_GL000219v1	1	179198	515	179198	100	28.9554	81.8	57.7
chrUn_GL000220v1	1	161802	5822	143360	88.6021	433.152	77.9	23.8
chrUn_GL000224v1	1	179693	1691	179692	99.9994	103.306	82.6	54.3
chrUn_KI270741v1	1	157432	110	143101	90.897	6.85604	81.6	39.6
chrUn_GL000226v1	1	15008	315	14920	99.4136	99.9336	82.3	52.8
chrUn_GL000213v1	1	164239	81	131304	79.9469	5.80715	81.2	48.1
chrUn_KI270743v1	1	210658	600	210658	100	32.2149	82.7	57.3
chrUn_KI270744v1	1	168472	1427	167690	99.5358	78.2254	82.4	54.6
chrUn_KI270745v1	1	41891	47	41300	98.5892	11.6096	91	60
chrUn_KI270746v1	1	66486	442	66462	99.9639	65.0423	82.6	59.3
chrUn_KI270747v1	1	198735	208	183305	92.2359	9.48528	82	45.2
chrUn_KI270748v1	1	93321	39	72799	78.0092	4.28779	83.8	40.3
chrUn_KI270749v1	1	158759	399	158759	100	29.6054	82.6	59.9
chrUn_KI270750v1	1	148850	489	148850	100	38.9347	82.6	50
chrUn_KI270751v1	1	150742	893	150648	99.9376	61.4767	83.9	46.2
chrUn_KI270753v1	1	62944	141	62944	100	26.5366	83.9	43.3
chrUn_KI270754v1	1	40191	245	40191	100	69.8766	81.3	34.2
chrUn_KI270755v1	1	36723	24	36497	99.3846	8.12431	82.3	42.9
chrUn_KI270756v1	1	79590	189	65963	82.8785	15.7068	84.9	44.6
chrUn_KI270757v1	1	71251	661	65410	91.8022	65.587	81.9	58.1
chrUn_GL000214v1	1	137718	1141	136675	99.2427	78.7867	81.6	48.7
chrUn_KI270742v1	1	186739	957	186739	100	61.1487	81.7	41.9
chrUn_GL000216v2	1	176608	954	176608	100	33.4836	83.5	50.2
chrUn_GL000218v1	1	161147	601	161147	100	44.4043	82.9	55.6
chrEBV	1	171823	3038	160774	93.5695	186.176	80.4	55.1
chr14_KI270726v1_random	1	43739	0	0	0	0	0	0
chrUn_KI270304v1	1	2165	0	0	0	0	0	0
chrUn_KI270310v1	1	1201	0	0	0	0	0	0
chrUn_KI270316v1	1	1444	0	0	0	0	0	0
chrUn_KI270312v1	1	998	0	0	0	0	0	0
chrUn_KI270317v1	1	37690	0	0	0	0	0	0
chrUn_KI270412v1	1	1179	0	0	0	0	0	0
chrUn_KI270414v1	1	2489	0	0	0	0	0	0
chrUn_KI270424v1	1	2140	0	0	0	0	0	0
chrUn_KI270528v1	1	2983	0	0	0	0	0	0
chrUn_KI270539v1	1	993	0	0	0	0	0	0
chrUn_KI270548v1	1	1599	0	0	0	0	0	0
chrUn_KI270329v1	1	1040	0	0	0	0	0	0
chrUn_KI270334v1	1	1368	0	0	0	0	0	0
chrUn_KI270335v1	1	1048	0	0	0	0	0	0
chrUn_KI270338v1	1	1428	0	0	0	0	0	0
chrUn_KI270340v1	1	1428	0	0	0	0	0	0
chrUn_KI270336v1	1	1026	0	0	0	0	0	0
chrUn_KI270363v1	1	1803	0	0	0	0	0	0
chrUn_KI270364v1	1	2855	0	0	0	0	0	0
chrUn_KI270378v1	1	1048	0	0	0	0	0	0
chrUn_KI270379v1	1	1045	0	0	0	0	0	0
chrUn_KI270389v1	1	1298	0	0	0	0	0	0
chrUn_KI270390v1	1	2387	0	0	0	0	0	0
chrUn_KI270387v1	1	1537	0	0	0	0	0	0
chrUn_KI270396v1	1	1880	0	0	0	0	0	0
chrUn_KI270388v1	1	1216	0	0	0	0	0	0
chrUn_KI270394v1	1	970	0	0	0	0	0	0
chrUn_KI270386v1	1	1788	0	0	0	0	0	0
chrUn_KI270391v1	1	1484	0	0	0	0	0	0
chrUn_KI270383v1	1	1750	0	0	0	0	0	0
chrUn_KI270393v1	1	1308	0	0	0	0	0	0
chrUn_KI270384v1	1	1658	0	0	0	0	0	0
chrUn_KI270381v1	1	1930	0	0	0	0	0	0
chrUn_KI270385v1	1	990	0	0	0	0	0	0
chrUn_KI270376v1	1	1136	0	0	0	0	0	0
chrUn_KI270374v1	1	2656	0	0	0	0	0	0
chrUn_KI270372v1	1	1650	0	0	0	0	0	0
chrUn_KI270373v1	1	1451	0	0	0	0	0	0
chrUn_KI270375v1	1	2378	0	0	0	0	0	0
chrUn_KI270371v1	1	2805	0	0	0	0	0	0
chrUn_KI270752v1	1	27745	0	0	0	0	0	0

## Sheet: NP_minimap2
#rname	startpos	endpos	numreads	covbases	coverage	meandepth	meanbaseq	meanmapq
chr1	1	248956422	1316231	230235470	92.4802	37.7867	20.2	48
chr2	1	242193529	4258840	239917221	99.0601	40.1079	20.6	18.2
chr3	1	198295559	981159	197845386	99.773	37.7894	20.3	55.9
chr4	1	190214555	985874	189233325	99.4841	39.8297	20.2	52
chr5	1	181538259	876579	178854681	98.5218	37.1564	20.3	54.7
chr6	1	170805979	815651	169908603	99.4746	37.4983	20.3	56.7
chr7	1	159345973	840144	158862876	99.6968	37.5093	20.3	49.7
chr8	1	145138636	706779	144561634	99.6024	37.2117	20.2	54.1
chr9	1	138394717	606698	120905132	87.3625	33.7857	20.3	52
chr10	1	133797422	786911	132933863	99.3546	37.9547	20.2	45.2
chr11	1	135086622	699495	134494985	99.562	37.5146	20.2	51.3
chr12	1	133275309	673345	133009772	99.8008	37.9345	20.4	53.5
chr13	1	114364328	467086	97951434	85.6486	32.6205	20.2	55
chr14	1	107043718	442374	88415056	82.5971	31.2147	20.3	54.5
chr15	1	101991189	516314	84429862	82.7815	32.9232	20.3	43.3
chr16	1	90338345	471179	81760617	90.5049	36.9247	20.3	48.3
chr17	1	83257441	442328	81068097	97.3704	37.2793	20.2	49.5
chr18	1	80373285	413788	79875129	99.3802	36.8051	20.4	49
chr19	1	58617616	402182	55747517	95.1037	36.3404	20.6	39.2
chr20	1	64444167	348302	63873388	99.1143	39.3238	20.1	48.5
chr21	1	46709983	294766	38019062	81.3939	35.4168	20.3	34.5
chr22	1	50818468	263377	37054132	72.9147	32.7008	21.4	41
chrX	1	156040895	792878	154751084	99.1734	36.1372	20.5	48.5
chrY	1	57227415	27463	1805413	3.1548	1.8305	17.4	13.2
chrM	1	16569	86223	16569	100	11954.1	18.1	57.3
chr1_KI270706v1_random	1	175055	1021	175055	100	47.2077	19.7	45.5
chr1_KI270707v1_random	1	32032	116	32032	100	22.5498	21.1	51.2
chr1_KI270708v1_random	1	127682	543	127682	100	32.2459	20.3	49.1
chr1_KI270709v1_random	1	66860	7040	66860	100	562.885	20.4	21.3
chr1_KI270710v1_random	1	40176	307	40176	100	48.2626	20.9	40.3
chr1_KI270711v1_random	1	42210	511	42210	100	64.679	20.4	38.8
chr1_KI270712v1_random	1	176043	1650	176038	99.9972	33.5704	18.1	18.8
chr1_KI270713v1_random	1	40745	532	40558	99.541	80.2515	19.8	49.7
chr1_KI270714v1_random	1	41717	161	41717	100	25.726	19.2	49.3
chr2_KI270715v1_random	1	161471	959	161471	100	51.1645	19.8	10.5
chr2_KI270716v1_random	1	153799	2424	153798	99.9993	112.966	19.8	4.54
chr3_GL000221v1_random	1	155397	1588	155397	100	85.2612	20.4	14.9
chr4_GL000008v2_random	1	209709	3094	209709	100	115.6	19.4	38.2
chr5_GL000208v1_random	1	92689	828	92689	100	64.7752	20.3	42.2
chr9_KI270717v1_random	1	40062	173	40062	100	27.2311	19.9	39.1
chr9_KI270718v1_random	1	38054	369	38047	99.9816	48.6549	21.1	24.5
chr9_KI270719v1_random	1	176845	927	176844	99.9994	44.0851	20.2	38.7
chr9_KI270720v1_random	1	39050	207	39050	100	30.7981	20.7	47.7
chr11_KI270721v1_random	1	100316	145	82162	81.9032	7.51211	17.7	4.06
chr14_GL000009v2_random	1	201709	1781	201688	99.9896	75.3453	19.9	38.3
chr14_GL000225v1_random	1	211173	15605	211173	100	537.334	18.4	26.3
chr14_KI270722v1_random	1	194050	958	194050	100	42.5404	20.3	49.8
chr14_GL000194v1_random	1	191469	1387	191462	99.9963	54.2483	20.5	36.4
chr14_KI270723v1_random	1	38115	353	38115	100	50.0587	19.8	38.2
chr14_KI270724v1_random	1	39555	334	39555	100	43.2692	19.8	41.8
chr14_KI270725v1_random	1	172810	900	172810	100	40.4949	19.8	42.7
chr14_KI270726v1_random	1	43739	16	15006	34.3081	0.760374	19	9.81
chr15_KI270727v1_random	1	448248	705	413490	92.2458	11.7336	20	11.7
chr16_KI270728v1_random	1	1872759	7407	1571209	83.8981	24.4906	19.8	22.7
chr17_GL000205v2_random	1	185591	2562	185543	99.9741	110.836	19.9	47.7
chr17_KI270729v1_random	1	280839	19092	270112	96.1804	132.02	14	8.82
chr17_KI270730v1_random	1	112551	3081	109688	97.4563	101.973	16.3	15.2
chr22_KI270731v1_random	1	150754	600	150751	99.998	26.4585	20	16.9
chr22_KI270732v1_random	1	41543	774	41543	100	130.591	20.7	52.9
chr22_KI270733v1_random	1	179772	34839	179772	100	564.802	24.2	8.65
chr22_KI270734v1_random	1	165050	1949	164988	99.9624	60.2384	20.5	18.2
chr22_KI270735v1_random	1	42811	800	42811	100	98.2605	19.9	38.9
chr22_KI270736v1_random	1	181920	8075	171541	94.2947	366.353	17.9	12.5
chr22_KI270737v1_random	1	103838	7602	103543	99.7159	86.8292	10.3	2.61
chr22_KI270738v1_random	1	99375	7335	96339	96.9449	89.4472	12	5.01
chr22_KI270739v1_random	1	73985	146	69644	94.1326	8.50582	18.2	17.1
chrUn_KI270302v1	1	2274	5	2274	100	3.15655	19.3	21
chrUn_KI270304v1	1	2165	2	1261	58.2448	0.716859	17.6	1
chrUn_KI270303v1	1	1942	5	1941	99.9485	2.73893	15.6	2.2
chrUn_KI270305v1	1	1472	1	1136	77.1739	0.771739	18.6	60
chrUn_KI270322v1	1	21476	13	5671	26.4062	0.565282	17.6	34.2
chrUn_KI270320v1	1	4416	50	4416	100	26.5238	17.9	25.7
chrUn_KI270310v1	1	1201	8	981	81.6819	4.02914	15.8	1.88
chrUn_KI270316v1	1	1444	5	1438	99.5845	1.80125	16.2	1
chrUn_KI270315v1	1	2276	2	553	24.297	0.440246	18.1	1
chrUn_KI270311v1	1	12399	19	2965	23.9132	1.78482	15.5	4.53
chrUn_KI270317v1	1	37690	7	3044	8.07641	0.253171	15	1.14
chrUn_KI270414v1	1	2489	1	310	12.4548	0.124548	10.6	1
chrUn_KI270419v1	1	1029	7	1027	99.8056	6.1069	16.7	12
chrUn_KI270418v1	1	2145	17	2142	99.8601	9.82751	17	18.2
chrUn_KI270420v1	1	2321	6	2320	99.9569	2.5601	17.6	20.3
chrUn_KI270424v1	1	2140	9	2140	100	6.55981	18.3	23.6
chrUn_KI270417v1	1	2043	3	2043	100	2.17719	21.5	60
chrUn_KI270422v1	1	1445	3	1430	98.9619	2.0782	13.9	12
chrUn_KI270423v1	1	981	3	898	91.5392	2.14475	18.5	7.67
chrUn_KI270425v1	1	1884	3	448	23.7792	0.289809	16.4	0.667
chrUn_KI270429v1	1	1361	3	1360	99.9265	1.65393	16.4	20.7
chrUn_KI270442v1	1	392061	6357	372538	95.0204	95.2409	19.8	39.7
chrUn_KI270466v1	1	1233	1947	1233	100	1284.26	22.1	29.6
chrUn_KI270465v1	1	1774	28	1774	100	18.2356	18.6	24.4
chrUn_KI270467v1	1	3920	26391	3920	100	16972.7	21.4	39
chrUn_KI270435v1	1	92983	886	92967	99.9828	61.3179	21	41.7
chrUn_KI270438v1	1	112505	27251	84898	75.4615	1643.46	17.9	31.7
chrUn_KI270468v1	1	4055	25	4054	99.9753	12.4017	18.7	48.1
chrUn_KI270510v1	1	2415	68	2415	100	47.9586	20.6	24.5
chrUn_KI270509v1	1	2318	15	2318	100	9.44607	20.8	43.1
chrUn_KI270518v1	1	2186	35	2186	100	22.6519	20.8	27.1
chrUn_KI270508v1	1	1951	17	1951	100	10.9129	25.7	44
chrUn_KI270516v1	1	1300	32	1300	100	27.5246	21.1	54.5
chrUn_KI270512v1	1	22689	251	22685	99.9824	57.0085	21.4	41.5
chrUn_KI270519v1	1	138126	1867	138115	99.992	94.9953	20.7	39.3
chrUn_KI270522v1	1	5674	34	5674	100	17.2903	18.3	47.7
chrUn_KI270511v1	1	8127	86	8126	99.9877	50.2766	21.3	47.2
chrUn_KI270515v1	1	6361	138	6361	100	90.0178	21.1	49.3
chrUn_KI270507v1	1	5353	70	5353	100	34.6525	19.7	43.6
chrUn_KI270517v1	1	3253	62	3253	100	40.0418	21.2	53.9
chrUn_KI270529v1	1	1899	31	1899	100	12.9916	17.6	20.9
chrUn_KI270528v1	1	2983	32	2983	100	6.29568	11.2	2
chrUn_KI270530v1	1	2168	5	2168	100	3.16974	17.4	8
chrUn_KI270538v1	1	91309	1462	64526	70.6677	86.6902	18.1	42.1
chrUn_KI270544v1	1	1202	11	1201	99.9168	7.33111	21.2	10.6
chrUn_KI270583v1	1	1400	9	1397	99.7857	4.79143	17.7	24.3
chrUn_KI270587v1	1	2969	14	2968	99.9663	8.3321	20.7	41
chrUn_KI270580v1	1	1553	3	1328	85.5119	1.30908	26.4	44.3
chrUn_KI270581v1	1	7046	19	6695	95.0185	5.75873	23.9	4.84
chrUn_KI270579v1	1	31033	84	31033	100	15.7806	21.1	13.3
chrUn_KI270589v1	1	44474	425	35396	79.5881	32.0722	20.3	27.2
chrUn_KI270590v1	1	4685	106	4684	99.9787	60.3635	20.5	36.8
chrUn_KI270584v1	1	4513	69	4513	100	33.764	20.5	48.5
chrUn_KI270582v1	1	6504	19	5954	91.5437	7.004	22.1	31.6
chrUn_KI270588v1	1	6158	42	6155	99.9513	17.7061	20.3	34
chrUn_KI270593v1	1	3041	10	2934	96.4814	3.93653	21.9	36
chrUn_KI270591v1	1	5796	135	5796	100	61.7529	19.4	25.7
chrUn_KI270330v1	1	1652	29	1652	100	14.1005	19.8	36.6
chrUn_KI270329v1	1	1040	3	1040	100	2.33558	20.4	30.3
chrUn_KI270334v1	1	1368	2	1367	99.9269	1.95687	16.4	37
chrUn_KI270333v1	1	2699	7176	2699	100	4045.92	20	26.7
chrUn_KI270335v1	1	1048	1	1040	99.2366	0.992366	16.6	60
chrUn_KI270340v1	1	1428	1	842	58.9636	0.589636	16.5	22
chrUn_KI270336v1	1	1026	1141	1026	100	520.236	21.1	15.5
chrUn_KI270337v1	1	1121	1699	1121	100	927.073	21.7	19.2
chrUn_KI270362v1	1	3530	8	3294	93.3144	2.19915	18	23.1
chrUn_KI270366v1	1	8320	24	7954	95.601	5.26298	18.8	6.71
chrUn_KI270390v1	1	2387	4	2387	100	2.99372	13.7	5.25
chrUn_KI270395v1	1	1143	1	778	68.0665	0.680665	20.9	1
chrUn_KI270396v1	1	1880	5	1880	100	4.4016	22.1	25.6
chrUn_KI270394v1	1	970	1	499	51.4433	0.514433	7.24	1
chrUn_KI270386v1	1	1788	1	1551	86.745	0.86745	17.9	4
chrUn_KI270393v1	1	1308	1	1103	84.3272	0.843272	15.7	1
chrUn_KI270384v1	1	1658	2	988	59.5899	1.04584	21.2	24.5
chrUn_KI270381v1	1	1930	3	1903	98.601	2.35026	17.5	1.67
chrUn_KI270385v1	1	990	1	102	10.303	0.10303	24	1
chrUn_KI270382v1	1	4215	6	4200	99.6441	2.27995	17.4	13.5
chrUn_KI270372v1	1	1650	1	814	49.3333	0.493333	22.2	9
chrUn_KI270375v1	1	2378	2	2242	94.2809	1.08368	19.3	3
chrUn_KI270448v1	1	7992	72	7992	100	37.7165	18.7	48.5
chrUn_KI270521v1	1	7642	64	7642	100	34.0527	19.4	46.1
chrUn_GL000195v1	1	182896	1881	182896	100	87.7382	20.4	37.1
chrUn_GL000219v1	1	179198	1347	160636	89.6416	54.162	20.3	50.2
chrUn_GL000220v1	1	161802	13505	161682	99.9258	524.631	22.1	5.04
chrUn_GL000224v1	1	179693	3659	179693	100	144.745	19.1	41.8
chrUn_KI270741v1	1	157432	216	137214	87.1576	8.767	19.4	12.5
chrUn_GL000226v1	1	15008	11340	15008	100	5423.34	17.4	5.62
chrUn_GL000213v1	1	164239	232	163271	99.4106	9.39899	20.4	26.5
chrUn_KI270743v1	1	210658	1582	210658	100	53.8979	20.1	45.5
chrUn_KI270744v1	1	168472	4308	168472	100	146.796	19.5	39
chrUn_KI270745v1	1	41891	109	41787	99.7517	13.4655	19.3	34.6
chrUn_KI270746v1	1	66486	752	66486	100	93.6708	20	53.1
chrUn_KI270747v1	1	198735	3628	198729	99.997	40.0517	14.9	4.31
chrUn_KI270748v1	1	93321	410	91530	98.0808	32.8962	20.4	20.9
chrUn_KI270749v1	1	158759	1144	158759	100	55.947	20.1	50.9
chrUn_KI270750v1	1	148850	932	145343	97.6439	45.8542	20.1	42.8
chrUn_KI270751v1	1	150742	1857	150639	99.9317	88.5667	20.6	34.5
chrUn_KI270753v1	1	62944	335	62937	99.9889	37.374	19.2	34.7
chrUn_KI270754v1	1	40191	652	40191	100	108.093	18.6	22.5
chrUn_KI270755v1	1	36723	66	36196	98.5649	11.9151	19.2	32.6
chrUn_KI270756v1	1	79590	2094	79590	100	80.5828	14.9	9.29
chrUn_KI270757v1	1	71251	1483	62024	87.05	130.3	20.5	37.5
chrUn_GL000214v1	1	137718	1327	137718	100	74.3161	20	19.4
chrUn_KI270742v1	1	186739	2473	186739	100	103.628	20.5	33.2
chrUn_GL000216v2	1	176608	8458	176608	100	284.713	17.5	17.4
chrUn_GL000218v1	1	161147	2240	161147	100	105.037	20	49.1
chrEBV	1	171823	83723	160708	93.5311	1270.42	18	49.4
chrY_KI270740v1_random	1	37240	0	0	0	0	0	0
chrUn_KI270312v1	1	998	0	0	0	0	0	0
chrUn_KI270412v1	1	1179	0	0	0	0	0	0
chrUn_KI270411v1	1	2646	0	0	0	0	0	0
chrUn_KI270539v1	1	993	0	0	0	0	0	0
chrUn_KI270548v1	1	1599	0	0	0	0	0	0
chrUn_KI270338v1	1	1428	0	0	0	0	0	0
chrUn_KI270363v1	1	1803	0	0	0	0	0	0
chrUn_KI270364v1	1	2855	0	0	0	0	0	0
chrUn_KI270378v1	1	1048	0	0	0	0	0	0
chrUn_KI270379v1	1	1045	0	0	0	0	0	0
chrUn_KI270389v1	1	1298	0	0	0	0	0	0
chrUn_KI270387v1	1	1537	0	0	0	0	0	0
chrUn_KI270388v1	1	1216	0	0	0	0	0	0
chrUn_KI270391v1	1	1484	0	0	0	0	0	0
chrUn_KI270383v1	1	1750	0	0	0	0	0	0
chrUn_KI270392v1	1	971	0	0	0	0	0	0
chrUn_KI270376v1	1	1136	0	0	0	0	0	0
chrUn_KI270374v1	1	2656	0	0	0	0	0	0
chrUn_KI270373v1	1	1451	0	0	0	0	0	0
chrUn_KI270371v1	1	2805	0	0	0	0	0	0
chrUn_KI270752v1	1	27745	0	0	0	0	0	0

## Sheet: NP_ngmlr
#rname	startpos	endpos	numreads	covbases	coverage	meandepth	meanbaseq	meanmapq
chr1	1	248956422	1061645	227743528	91.4793	33.3715	20.5	53.7
chr2	1	242193529	1127609	239345528	98.8241	36.3557	20.4	53.5
chr3	1	198295559	902297	195929063	98.8066	36.5499	20.5	55.4
chr4	1	190214555	861686	187897215	98.7817	36.1401	20.5	54.5
chr5	1	181538259	823295	177993261	98.0472	35.9384	20.5	54.3
chr6	1	170805979	783866	168930107	98.9018	36.4317	20.5	55.2
chr7	1	159345973	723479	156950136	98.4965	35.7748	20.5	53.3
chr8	1	145138636	649758	142879044	98.4431	35.8164	20.4	55.1
chr9	1	138394717	555069	119878316	86.6206	31.5634	20.4	51.1
chr10	1	133797422	612940	131396144	98.2053	35.509	20.4	53.9
chr11	1	135086622	609819	133180916	98.5893	35.9223	20.4	54.9
chr12	1	133275309	609462	131138939	98.397	36.4544	20.6	55.4
chr13	1	114364328	435561	96483182	84.3648	30.5633	20.5	55
chr14	1	107043718	410023	88410436	82.5928	30.4015	20.5	54.7
chr15	1	101991189	385382	82447721	80.8381	30.434	20.4	53.1
chr16	1	90338345	488738	79896420	88.4413	34.5339	20.7	45.4
chr17	1	83257441	400100	79221000	95.1519	35.2194	20.5	51.3
chr18	1	80373285	342641	75697451	94.1824	34.2153	20.4	54.9
chr19	1	58617616	269495	55694776	95.0137	33.9213	20.8	54
chr20	1	64444167	301914	62081386	96.3336	35.3079	20.2	52.8
chr21	1	46709983	192872	37724398	80.763	30.0951	20.5	46.2
chr22	1	50818468	177131	37051315	72.9092	25.9485	20.4	49.8
chrX	1	156040895	657440	151381085	97.0137	33.9833	20.7	53.7
chrY	1	57227415	10367	2804485	4.9006	0.501775	19.6	22.1
chrM	1	16569	75911	16569	100	11413.1	18.4	48
chr1_KI270706v1_random	1	175055	865	175054	99.9994	35.027	19.8	12.8
chr1_KI270707v1_random	1	32032	147	31546	98.4828	30.6436	21.2	15
chr1_KI270708v1_random	1	127682	574	127682	100	34.475	20.8	22.2
chr1_KI270709v1_random	1	66860	774	66839	99.9686	63.23	20.3	24.8
chr1_KI270710v1_random	1	40176	274	40176	100	44.7154	21.2	17
chr1_KI270711v1_random	1	42210	604	42210	100	61.8819	20.2	10.1
chr1_KI270712v1_random	1	176043	812	175866	99.8995	17.2136	19.9	17.3
chr1_KI270713v1_random	1	40745	686	40745	100	89.6586	20.1	18.5
chr1_KI270714v1_random	1	41717	204	41717	100	32.9461	19.1	18.8
chr2_KI270715v1_random	1	161471	229	160382	99.3256	5.85575	20.3	7.2
chr2_KI270716v1_random	1	153799	213	77765	50.5627	7.58876	18.1	18.3
chr3_GL000221v1_random	1	155397	748	155394	99.9981	27.9475	20.4	7.13
chr4_GL000008v2_random	1	209709	2898	209708	99.9995	54.1677	19.4	22.6
chr5_GL000208v1_random	1	92689	668	90304	97.4269	49.5	21.1	32.5
chr9_KI270717v1_random	1	40062	58	40004	99.8552	8.56305	19.6	7.43
chr9_KI270718v1_random	1	38054	418	38053	99.9974	39.4457	20.6	18.2
chr9_KI270719v1_random	1	176845	1121	176845	100	42.5409	20.6	14.1
chr9_KI270720v1_random	1	39050	354	39050	100	45.0497	20.8	28.4
chr11_KI270721v1_random	1	100316	224	98918	98.6064	16.8423	17.4	21.5
chr14_GL000009v2_random	1	201709	1390	201709	100	47.7477	20.3	11.7
chr14_GL000225v1_random	1	211173	5486	211173	100	86.25	18.7	21.6
chr14_KI270722v1_random	1	194050	924	194050	100	31.1182	20.4	30
chr14_GL000194v1_random	1	191469	1314	191446	99.988	42.7853	20.5	13.6
chr14_KI270723v1_random	1	38115	371	38115	100	45.6181	20.2	22.3
chr14_KI270724v1_random	1	39555	380	39555	100	50.1485	20.1	23.3
chr14_KI270725v1_random	1	172810	832	172809	99.9994	30.676	20.3	14.3
chr14_KI270726v1_random	1	43739	42	22461	51.3523	2.91424	20.2	26.3
chr15_KI270727v1_random	1	448248	576	389495	86.8927	6.98062	20.2	8.3
chr16_KI270728v1_random	1	1872759	5344	1502687	80.2392	18.2062	20.4	13.3
chr17_GL000205v2_random	1	185591	2829	185257	99.82	102.266	20.2	35.8
chr17_KI270729v1_random	1	280839	9329	269583	95.992	75.6308	18	32.5
chr17_KI270730v1_random	1	112551	2449	106712	94.8121	47.7994	18.3	27.4
chr22_KI270731v1_random	1	150754	516	148843	98.7324	17.7123	19.6	6.52
chr22_KI270732v1_random	1	41543	857	41543	100	138.961	20.8	25.3
chr22_KI270733v1_random	1	179772	10597	179407	99.797	255.279	23.3	10.3
chr22_KI270734v1_random	1	165050	554	165013	99.9776	16.4475	19.6	11.7
chr22_KI270735v1_random	1	42811	1120	42811	100	121.018	20.3	25.4
chr22_KI270736v1_random	1	181920	3269	169678	93.2707	41.2357	18.4	31.3
chr22_KI270737v1_random	1	103838	326	101522	97.7696	14.7959	19	19.9
chr22_KI270738v1_random	1	99375	585	93635	94.2239	29.6384	19	35.5
chr22_KI270739v1_random	1	73985	201	72492	97.982	15.4387	19.3	17
chrUn_KI270302v1	1	2274	5	2274	100	4.43843	18.8	4.4
chrUn_KI270303v1	1	1942	1	621	31.9773	0.319773	15.6	20
chrUn_KI270305v1	1	1472	4	1470	99.8641	3.72894	19	10.2
chrUn_KI270322v1	1	21476	26	6205	28.8927	2.16828	18.1	8.54
chrUn_KI270320v1	1	4416	34	4415	99.9774	22.3802	18	8.41
chrUn_KI270311v1	1	12399	27	1752	14.1302	2.80256	15.7	21.1
chrUn_KI270412v1	1	1179	1	165	13.9949	0.139949	20.7	1
chrUn_KI270411v1	1	2646	1	115	4.34618	0.0434618	19.4	0
chrUn_KI270414v1	1	2489	1	76	3.05344	0.0305344	12.9	9
chrUn_KI270419v1	1	1029	57	1027	99.8056	39.4043	18.5	21.9
chrUn_KI270418v1	1	2145	71	2145	100	64.3277	19	17.4
chrUn_KI270420v1	1	2321	33	2321	100	28.7721	18.2	18.9
chrUn_KI270424v1	1	2140	49	2140	100	35.7701	18.5	25.1
chrUn_KI270417v1	1	2043	17	2043	100	14.4366	20.3	41.4
chrUn_KI270422v1	1	1445	18	1444	99.9308	17.092	18.6	12.6
chrUn_KI270423v1	1	981	2	977	99.5923	1.98165	18.9	7
chrUn_KI270425v1	1	1884	8	864	45.8599	2.42144	16.8	15.1
chrUn_KI270429v1	1	1361	28	1361	100	24.906	18.3	31.1
chrUn_KI270442v1	1	392061	7183	372510	95.0133	82.2686	20.4	34.6
chrUn_KI270466v1	1	1233	4618	1233	100	2080.65	22.1	38.5
chrUn_KI270465v1	1	1774	381	1774	100	339.329	18.4	13.1
chrUn_KI270467v1	1	3920	21964	3920	100	8466.71	22	38.8
chrUn_KI270435v1	1	92983	1156	92924	99.9365	58.6961	21.3	30.9
chrUn_KI270438v1	1	112505	100390	84612	75.2073	1470.88	18.2	22.6
chrUn_KI270468v1	1	4055	90	4054	99.9753	63.0279	18.8	37.4
chrUn_KI270510v1	1	2415	225	2415	100	106.43	21.1	36.6
chrUn_KI270509v1	1	2318	222	2318	100	129.841	21.1	36.7
chrUn_KI270518v1	1	2186	182	2186	100	147.471	21.2	33.3
chrUn_KI270508v1	1	1951	218	1951	100	199.84	23.8	34
chrUn_KI270516v1	1	1300	163	1300	100	94.4962	21.4	41.5
chrUn_KI270512v1	1	22689	237	22591	99.5681	44.0193	22	29.3
chrUn_KI270519v1	1	138126	3040	129103	93.4676	86.5745	21.3	31.5
chrUn_KI270522v1	1	5674	43	5664	99.8238	29.4549	18.8	32.5
chrUn_KI270511v1	1	8127	102	8127	100	55.7587	21.6	39.5
chrUn_KI270515v1	1	6361	361	6361	100	166.989	21.6	35.8
chrUn_KI270507v1	1	5353	307	5353	100	137.048	21.3	32.3
chrUn_KI270517v1	1	3253	254	3253	100	186.721	21.3	35.1
chrUn_KI270529v1	1	1899	20	1899	100	16.1511	17.1	19.2
chrUn_KI270528v1	1	2983	5	2574	86.289	1.86088	19.4	15.4
chrUn_KI270530v1	1	2168	5	2167	99.9539	4.43266	17.9	13.6
chrUn_KI270539v1	1	993	28	992	99.8993	7.38973	20.2	44.8
chrUn_KI270538v1	1	91309	2129	63663	69.7226	68.2054	18.8	22.7
chrUn_KI270544v1	1	1202	1	45	3.74376	0.0374376	10.2	5
chrUn_KI270583v1	1	1400	99	1397	99.7857	71.3486	22.7	25.2
chrUn_KI270587v1	1	2969	88	2969	100	60.5477	21.2	31.2
chrUn_KI270580v1	1	1553	84	1553	100	71.6104	24.2	28.5
chrUn_KI270581v1	1	7046	6	5116	72.6086	1.46296	21.8	11.5
chrUn_KI270579v1	1	31033	55	30309	97.667	7.092	20.6	11.8
chrUn_KI270589v1	1	44474	744	35061	78.8348	39.0736	20.1	27.6
chrUn_KI270590v1	1	4685	442	4684	99.9787	166.461	20.4	34.1
chrUn_KI270584v1	1	4513	212	4513	100	114.669	21.4	28.5
chrUn_KI270582v1	1	6504	46	6504	100	20.3087	21.1	12.9
chrUn_KI270588v1	1	6158	98	6156	99.9675	46.6535	20	32.8
chrUn_KI270593v1	1	3041	90	3041	100	60.8083	20.7	41.3
chrUn_KI270591v1	1	5796	338	5796	100	74.4865	20	28.7
chrUn_KI270330v1	1	1652	72	1652	100	52.1326	18	11.6
chrUn_KI270334v1	1	1368	1	647	47.2953	0.472953	14.7	60
chrUn_KI270333v1	1	2699	481	2699	100	253.497	20.7	14.3
chrUn_KI270336v1	1	1026	50	1026	100	36.423	19.7	23.6
chrUn_KI270337v1	1	1121	176	1121	100	131.732	19.9	13.6
chrUn_KI270363v1	1	1803	13	1791	99.3344	5.00333	25.3	34.8
chrUn_KI270364v1	1	2855	5	2260	79.1594	1.24168	16.6	20.4
chrUn_KI270362v1	1	3530	30	3530	100	16.1482	20.4	28.7
chrUn_KI270366v1	1	8320	51	8318	99.976	17.6167	20.3	24.5
chrUn_KI270379v1	1	1045	1	990	94.7368	0.947368	21.2	24
chrUn_KI270389v1	1	1298	2	1283	98.8444	1.14022	21.1	5.5
chrUn_KI270390v1	1	2387	2	1290	54.0427	0.540427	22.1	7.5
chrUn_KI270387v1	1	1537	1	91	5.92062	0.0592062	22.6	0
chrUn_KI270395v1	1	1143	4	911	79.7025	1.2161	23.7	5
chrUn_KI270396v1	1	1880	2	1827	97.1809	1.82021	37.2	18.5
chrUn_KI270391v1	1	1484	9	1483	99.9326	8.44272	22.2	12.7
chrUn_KI270384v1	1	1658	1	39	2.35223	0.0235223	19.7	0
chrUn_KI270381v1	1	1930	1	1875	97.1503	0.971503	16	0
chrUn_KI270382v1	1	4215	21	4214	99.9763	12.4019	21.6	10.8
chrUn_KI270375v1	1	2378	2	2357	99.1169	1.83431	21	6.5
chrUn_KI270448v1	1	7992	96	7992	100	51.0419	19	31.7
chrUn_KI270521v1	1	7642	75	7642	100	37.027	19.8	25.1
chrUn_GL000195v1	1	182896	1505	182896	100	59.8855	20.3	12.6
chrUn_GL000219v1	1	179198	1605	159262	88.8749	46.7864	20.4	33
chrUn_GL000220v1	1	161802	9751	161772	99.9815	277.683	23	6.93
chrUn_GL000224v1	1	179693	3403	179693	100	92.1391	19.4	13.3
chrUn_KI270741v1	1	157432	412	137775	87.514	14.0175	19.8	18.3
chrUn_GL000226v1	1	15008	34	4712	31.3966	0.402985	20	0.294
chrUn_GL000213v1	1	164239	283	155710	94.807	9.33424	20.2	9.9
chrUn_KI270743v1	1	210658	1321	210658	100	44.128	20.3	11.3
chrUn_KI270744v1	1	168472	4222	168471	99.9994	99.2518	19.6	19.5
chrUn_KI270745v1	1	41891	87	36776	87.7897	8.01079	19	6.43
chrUn_KI270746v1	1	66486	932	66486	100	93.1057	20.3	26.1
chrUn_KI270747v1	1	198735	399	164007	82.5255	13.1862	19.4	11.8
chrUn_KI270748v1	1	93321	150	80087	85.8188	6.0358	18.7	5.89
chrUn_KI270749v1	1	158759	1034	158759	100	52.4308	20.2	12.8
chrUn_KI270750v1	1	148850	1153	148849	99.9993	50.8929	20.1	27.4
chrUn_KI270751v1	1	150742	1810	150705	99.9755	80.9565	20.9	19.4
chrUn_KI270753v1	1	62944	439	62944	100	40.4804	19.4	14.5
chrUn_KI270754v1	1	40191	264	40190	99.9975	27.8088	19	12.9
chrUn_KI270755v1	1	36723	127	36718	99.9864	12.6358	19.6	17.7
chrUn_KI270756v1	1	79590	743	79537	99.9334	37.823	18.2	22.3
chrUn_KI270757v1	1	71251	2192	61851	86.8072	102.482	20.8	29.7
chrUn_GL000214v1	1	137718	843	136796	99.3305	34.8083	20.4	9.03
chrUn_KI270742v1	1	186739	1388	186739	100	51.7479	20.3	7.67
chrUn_GL000216v2	1	176608	5644	176394	99.8788	105.461	18.5	25
chrUn_GL000218v1	1	161147	1958	161147	100	98.1974	20.4	13.8
chrEBV	1	171823	70205	161110	93.7651	1101.09	18.3	53.9
chrY_KI270740v1_random	1	37240	0	0	0	0	0	0
chrUn_KI270304v1	1	2165	0	0	0	0	0	0
chrUn_KI270310v1	1	1201	0	0	0	0	0	0
chrUn_KI270316v1	1	1444	0	0	0	0	0	0
chrUn_KI270315v1	1	2276	0	0	0	0	0	0
chrUn_KI270312v1	1	998	0	0	0	0	0	0
chrUn_KI270317v1	1	37690	0	0	0	0	0	0
chrUn_KI270548v1	1	1599	0	0	0	0	0	0
chrUn_KI270329v1	1	1040	0	0	0	0	0	0
chrUn_KI270335v1	1	1048	0	0	0	0	0	0
chrUn_KI270338v1	1	1428	0	0	0	0	0	0
chrUn_KI270340v1	1	1428	0	0	0	0	0	0
chrUn_KI270378v1	1	1048	0	0	0	0	0	0
chrUn_KI270388v1	1	1216	0	0	0	0	0	0
chrUn_KI270394v1	1	970	0	0	0	0	0	0
chrUn_KI270386v1	1	1788	0	0	0	0	0	0
chrUn_KI270383v1	1	1750	0	0	0	0	0	0
chrUn_KI270393v1	1	1308	0	0	0	0	0	0
chrUn_KI270392v1	1	971	0	0	0	0	0	0
chrUn_KI270385v1	1	990	0	0	0	0	0	0
chrUn_KI270376v1	1	1136	0	0	0	0	0	0
chrUn_KI270374v1	1	2656	0	0	0	0	0	0
chrUn_KI270372v1	1	1650	0	0	0	0	0	0
chrUn_KI270373v1	1	1451	0	0	0	0	0	0
chrUn_KI270371v1	1	2805	0	0	0	0	0	0
chrUn_KI270752v1	1	27745	0	0	0	0	0	0

## Sheet: NP_winnowmap2
#rname	startpos	endpos	numreads	covbases	coverage	meandepth	meanbaseq	meanmapq
chr1	1	248956422	1490709	230250047	92.4861	37.4783	20.3	43.2
chr2	1	242193529	9119711	239353003	98.8272	39.497	21	15.2
chr3	1	198295559	2188475	197833505	99.767	39.9339	22.1	31.5
chr4	1	190214555	1038635	189297040	99.5176	39.6729	20.3	49.7
chr5	1	181538259	1161066	178832594	98.5096	37.17	20.5	42.5
chr6	1	170805979	6923168	169921507	99.4822	38.3408	21.9	10.7
chr7	1	159345973	1030649	158819875	99.6698	37.3072	20.5	42.6
chr8	1	145138636	1060281	144562000	99.6027	37.4528	20.7	38.4
chr9	1	138394717	630881	121055998	87.4715	33.62	20.4	50.2
chr10	1	133797422	756336	132977596	99.3873	37.9365	20.3	47.1
chr11	1	135086622	874854	133778683	99.0318	37.282	20.4	40.7
chr12	1	133275309	717086	132915205	99.7298	37.6064	20.5	49.8
chr13	1	114364328	486454	97958278	85.6546	32.35	20.3	51.9
chr14	1	107043718	1162807	88415394	82.5975	31.9599	20.8	25.4
chr15	1	101991189	545599	84476607	82.8274	32.7613	20.7	42.3
chr16	1	90338345	551669	81772694	90.5183	37.2781	20.9	42.8
chr17	1	83257441	431907	81630562	98.046	36.9045	20.3	50.6
chr18	1	80373285	383801	79628301	99.0731	36.5148	20.3	52.1
chr19	1	58617616	2045823	55750900	95.1095	39.4614	23.9	14.7
chr20	1	64444167	352085	63899702	99.1551	39.1318	20.1	48
chr21	1	46709983	287083	37973105	81.2955	34.298	20.6	36.6
chr22	1	50818468	242599	37047556	72.9018	31.1753	20.5	48.3
chrX	1	156040895	921282	154389510	98.9417	35.6273	20.8	43.8
chrY	1	57227415	22063	1359224	2.37513	1.3745	17.6	23.3
chrM	1	16569	79067	16569	100	11685.6	18.3	56.2
chr1_KI270706v1_random	1	175055	1021	175055	100	46.5796	19.7	47
chr1_KI270707v1_random	1	32032	136	32032	100	32.4717	20.7	51.3
chr1_KI270708v1_random	1	127682	617	127682	100	41.9126	20.4	50.2
chr1_KI270709v1_random	1	66860	6249	66860	100	740.35	21.1	30.7
chr1_KI270710v1_random	1	40176	295	40176	100	54.3312	21	44.4
chr1_KI270711v1_random	1	42210	630	42210	100	89.7461	20.3	43.9
chr1_KI270712v1_random	1	176043	1133	176039	99.9977	32.462	19.4	29.4
chr1_KI270713v1_random	1	40745	552	40745	100	97.6448	19.8	49.1
chr1_KI270714v1_random	1	41717	164	41717	100	29.3003	19.1	48.9
chr2_KI270715v1_random	1	161471	2859	161471	100	178.565	19.9	14.3
chr2_KI270716v1_random	1	153799	1754	153799	100	104.09	19.9	15.1
chr3_GL000221v1_random	1	155397	1543	155397	100	86.2861	20.6	23.9
chr4_GL000008v2_random	1	209709	2676	209709	100	89.534	19.4	45.5
chr5_GL000208v1_random	1	92689	839	92689	100	68.256	20.5	43.4
chr9_KI270717v1_random	1	40062	183	40062	100	30.4274	20.3	32.7
chr9_KI270718v1_random	1	38054	435	38054	100	67.041	20.9	30.6
chr9_KI270719v1_random	1	176845	901	176843	99.9989	46.2779	20.4	42
chr9_KI270720v1_random	1	39050	239	39049	99.9974	45.7277	20.5	43.6
chr11_KI270721v1_random	1	100316	165	90137	89.8531	10.0628	17.5	9.5
chr14_GL000009v2_random	1	201709	1768	201708	99.9995	79.0127	20.2	41
chr14_GL000225v1_random	1	211173	15099	211172	99.9995	517.949	18.6	34.2
chr14_KI270722v1_random	1	194050	965	194048	99.999	40.4198	20.1	49.3
chr14_GL000194v1_random	1	191469	1349	191468	99.9995	54.3999	20.4	39.2
chr14_KI270723v1_random	1	38115	322	38115	100	48.8948	20	40.6
chr14_KI270724v1_random	1	39555	323	39555	100	47.8266	19.9	44.1
chr14_KI270725v1_random	1	172810	806	172810	100	38.7601	19.9	47.5
chr14_KI270726v1_random	1	43739	26	15187	34.7219	2.47354	20.1	40
chr15_KI270727v1_random	1	448248	652	416899	93.0063	12.3731	20.4	18.8
chr16_KI270728v1_random	1	1872759	18542	1568077	83.7308	28.7175	18.6	13.7
chr17_GL000205v2_random	1	185591	2478	182656	98.4186	111.344	19.9	49.7
chr17_KI270729v1_random	1	280839	11704	270433	96.2947	119.475	15	25
chr17_KI270730v1_random	1	112551	1714	108920	96.7739	74.8057	17.6	30.8
chr22_KI270731v1_random	1	150754	589	150747	99.9954	25.2434	20.1	21.2
chr22_KI270732v1_random	1	41543	750	41543	100	135.569	20.7	54.2
chr22_KI270733v1_random	1	179772	21271	179772	100	540.517	21.3	18.8
chr22_KI270734v1_random	1	165050	2721	165022	99.983	75.5194	21.3	22.8
chr22_KI270735v1_random	1	42811	1092	42811	100	142.28	19.9	39.3
chr22_KI270736v1_random	1	181920	7912	170180	93.5466	388.931	18.1	23.8
chr22_KI270737v1_random	1	103838	5321	103283	99.4655	113.589	9.49	11.2
chr22_KI270738v1_random	1	99375	4027	96239	96.8443	79.9071	12.9	15.1
chr22_KI270739v1_random	1	73985	159	73152	98.8741	11.6017	18.9	28.1
chrUn_KI270302v1	1	2274	1	330	14.5119	0.145119	19.5	0
chrUn_KI270304v1	1	2165	4	2165	100	2.65589	15.5	41.5
chrUn_KI270303v1	1	1942	2	1609	82.8527	0.828527	15.6	46
chrUn_KI270305v1	1	1472	1	1136	77.1739	0.771739	18.6	60
chrUn_KI270322v1	1	21476	12	4644	21.6241	0.545074	18.4	26
chrUn_KI270320v1	1	4416	37	4415	99.9774	20.3995	17.7	28.2
chrUn_KI270310v1	1	1201	3	1136	94.5878	1.68276	15.4	18.3
chrUn_KI270316v1	1	1444	1	240	16.6205	0.166205	16.7	1
chrUn_KI270311v1	1	12399	33	1387	11.1864	2.03605	15.5	12.8
chrUn_KI270317v1	1	37690	2	824	2.18626	0.0327673	15.3	13
chrUn_KI270411v1	1	2646	3	877	33.1444	0.382464	15.8	1
chrUn_KI270414v1	1	2489	1	1328	53.3548	0.533548	18.6	20
chrUn_KI270419v1	1	1029	1	648	62.9738	0.629738	10	3
chrUn_KI270420v1	1	2321	3	2068	89.0995	1.27704	12.4	20.7
chrUn_KI270424v1	1	2140	2	2092	97.757	1.31075	17.4	30
chrUn_KI270417v1	1	2043	6	2043	100	4.76016	21.4	43
chrUn_KI270423v1	1	981	1	347	35.3721	0.353721	20.7	5
chrUn_KI270425v1	1	1884	2	1409	74.7877	0.872611	9.85	0.5
chrUn_KI270429v1	1	1361	1	1188	87.2888	0.872888	18.8	60
chrUn_KI270442v1	1	392061	6123	374292	95.4678	98.709	20	46.3
chrUn_KI270466v1	1	1233	604	1233	100	428.878	21.8	44
chrUn_KI270465v1	1	1774	10	1774	100	5.25986	18.1	44.2
chrUn_KI270467v1	1	3920	29400	3920	100	20198.1	21.9	43.3
chrUn_KI270435v1	1	92983	913	92963	99.9785	65.2268	21.2	49.9
chrUn_KI270438v1	1	112505	26098	84899	75.4624	1678.09	18.1	38.7
chrUn_KI270468v1	1	4055	30	4054	99.9753	17.525	19.1	57
chrUn_KI270510v1	1	2415	51	2415	100	35.0526	20.9	46.5
chrUn_KI270509v1	1	2318	19	2318	100	12.9944	20.7	57.6
chrUn_KI270518v1	1	2186	33	2186	100	23.9767	20.5	50.8
chrUn_KI270508v1	1	1951	9	1951	100	6.05894	25.1	60
chrUn_KI270516v1	1	1300	36	1300	100	31.5523	20.9	59.6
chrUn_KI270512v1	1	22689	231	22687	99.9912	62.2451	21.6	49.3
chrUn_KI270519v1	1	138126	1741	138099	99.9805	88.5712	20.9	47
chrUn_KI270522v1	1	5674	23	5662	99.7885	10.9501	18.6	57.4
chrUn_KI270511v1	1	8127	62	8126	99.9877	36.0898	21.8	56.1
chrUn_KI270515v1	1	6361	103	6361	100	66.5254	21.6	57.1
chrUn_KI270507v1	1	5353	69	5353	100	28.1126	18.8	52.8
chrUn_KI270517v1	1	3253	56	3253	100	37.8051	20.8	58
chrUn_KI270529v1	1	1899	11	1899	100	6.80253	17.8	50.2
chrUn_KI270528v1	1	2983	6	2442	81.8639	1.67918	10.3	1.67
chrUn_KI270530v1	1	2168	3	2043	94.2343	1.5655	18.5	26.3
chrUn_KI270538v1	1	91309	1919	65578	71.8199	99.5591	18.2	52.8
chrUn_KI270544v1	1	1202	5	776	64.5591	2.13228	19.7	12.4
chrUn_KI270548v1	1	1599	1	1049	65.6035	0.656035	8.62	0
chrUn_KI270583v1	1	1400	3	1397	99.7857	1.85286	25.9	42
chrUn_KI270587v1	1	2969	14	2968	99.9663	8.01213	19.8	42.5
chrUn_KI270580v1	1	1553	2	797	51.32	0.736639	27.6	54.5
chrUn_KI270581v1	1	7046	17	6829	96.9202	5.64647	23.3	12.3
chrUn_KI270579v1	1	31033	79	31033	100	15.1831	21	13.6
chrUn_KI270589v1	1	44474	379	35364	79.5161	31.66	20.6	41.3
chrUn_KI270590v1	1	4685	118	4684	99.9787	86.289	20.9	53.2
chrUn_KI270584v1	1	4513	66	4513	100	36.7846	21.3	58.2
chrUn_KI270582v1	1	6504	26	6496	99.877	11.6505	22.4	37.8
chrUn_KI270588v1	1	6158	52	6155	99.9513	26.968	20	44
chrUn_KI270593v1	1	3041	14	3041	100	8.09372	21.1	55.8
chrUn_KI270591v1	1	5796	111	5796	100	62.0485	19.6	44.8
chrUn_KI270330v1	1	1652	10	1472	89.1041	3.30872	18.5	20.7
chrUn_KI270329v1	1	1040	1	382	36.7308	0.367308	21.8	0
chrUn_KI270334v1	1	1368	1	1335	97.5877	0.975877	16.1	60
chrUn_KI270333v1	1	2699	11452	2699	100	8302.35	21.8	28.2
chrUn_KI270335v1	1	1048	1	859	81.9656	0.819656	20.2	0
chrUn_KI270336v1	1	1026	389	1026	100	237.177	22.5	9.99
chrUn_KI270337v1	1	1121	513	1121	100	319.847	22.7	8.46
chrUn_KI270362v1	1	3530	7	3182	90.1416	2.07195	18.4	30.6
chrUn_KI270366v1	1	8320	22	7882	94.7356	4.9119	19.5	10.7
chrUn_KI270395v1	1	1143	1	513	44.8819	0.448819	12.9	15
chrUn_KI270396v1	1	1880	1	647	34.4149	0.344149	13.5	22
chrUn_KI270394v1	1	970	1	288	29.6907	0.296907	15.4	1
chrUn_KI270393v1	1	1308	1	780	59.633	0.59633	20.6	1
chrUn_KI270384v1	1	1658	1	749	45.1749	0.451749	19.1	1
chrUn_KI270381v1	1	1930	4	1758	91.0881	2.03057	20.8	13.5
chrUn_KI270382v1	1	4215	3	4215	100	1.6446	21.7	50.7
chrUn_KI270372v1	1	1650	1	814	49.3333	0.493333	22.2	1
chrUn_KI270448v1	1	7992	71	7992	100	40.8674	18.9	59
chrUn_KI270521v1	1	7642	55	7642	100	32.4058	19.6	56.3
chrUn_GL000195v1	1	182896	1972	182896	100	106.164	20.4	40
chrUn_GL000219v1	1	179198	1218	159287	88.8888	47.7555	20.4	53.5
chrUn_GL000220v1	1	161802	13666	161802	100	599.769	21.3	15.5
chrUn_GL000224v1	1	179693	3730	179693	100	163.34	19	39.6
chrUn_KI270741v1	1	157432	212	129264	82.1078	8.02087	20.1	13.2
chrUn_GL000226v1	1	15008	14279	15008	100	6742.93	17.4	19.1
chrUn_GL000213v1	1	164239	220	154058	93.8011	10.0718	20.7	27.9
chrUn_KI270743v1	1	210658	1571	210658	100	56.0774	20.2	45.2
chrUn_KI270744v1	1	168472	5087	168472	100	180.442	19.4	47.4
chrUn_KI270745v1	1	41891	104	41891	100	14.872	19.5	34.8
chrUn_KI270746v1	1	66486	740	66486	100	93.766	20	53.8
chrUn_KI270747v1	1	198735	1428	198730	99.9975	31.0561	16.8	15.2
chrUn_KI270748v1	1	93321	410	92496	99.116	34.8001	20.2	25
chrUn_KI270749v1	1	158759	1082	158759	100	57.547	19.9	50.7
chrUn_KI270750v1	1	148850	952	148529	99.7843	51.4128	20	44.5
chrUn_KI270751v1	1	150742	1868	150711	99.9794	96.6701	20.7	39.4
chrUn_KI270752v1	1	27745	14	108	0.389259	0.0526942	7.42	2.29
chrUn_KI270753v1	1	62944	350	62483	99.2676	42.3973	19.5	35.5
chrUn_KI270754v1	1	40191	699	40191	100	134.452	19.1	21.6
chrUn_KI270755v1	1	36723	70	36672	99.8611	12.6776	19.2	31.5
chrUn_KI270756v1	1	79590	887	79590	100	65.5309	16	26.1
chrUn_KI270757v1	1	71251	1394	61851	86.8072	119.319	20.5	49.4
chrUn_GL000214v1	1	137718	1280	137718	100	74.5818	19.8	22.2
chrUn_KI270742v1	1	186739	2468	186739	100	109.943	20.3	34.9
chrUn_GL000216v2	1	176608	6436	176608	100	223.117	17.9	29.4
chrUn_GL000218v1	1	161147	2159	161147	100	114.419	20.1	50.9
chrEBV	1	171823	78071	160360	93.3286	1249.78	18.1	48.8
chrY_KI270740v1_random	1	37240	0	0	0	0	0	0
chrUn_KI270315v1	1	2276	0	0	0	0	0	0
chrUn_KI270312v1	1	998	0	0	0	0	0	0
chrUn_KI270412v1	1	1179	0	0	0	0	0	0
chrUn_KI270418v1	1	2145	0	0	0	0	0	0
chrUn_KI270422v1	1	1445	0	0	0	0	0	0
chrUn_KI270539v1	1	993	0	0	0	0	0	0
chrUn_KI270338v1	1	1428	0	0	0	0	0	0
chrUn_KI270340v1	1	1428	0	0	0	0	0	0
chrUn_KI270363v1	1	1803	0	0	0	0	0	0
chrUn_KI270364v1	1	2855	0	0	0	0	0	0
chrUn_KI270378v1	1	1048	0	0	0	0	0	0
chrUn_KI270379v1	1	1045	0	0	0	0	0	0
chrUn_KI270389v1	1	1298	0	0	0	0	0	0
chrUn_KI270390v1	1	2387	0	0	0	0	0	0
chrUn_KI270387v1	1	1537	0	0	0	0	0	0
chrUn_KI270388v1	1	1216	0	0	0	0	0	0
chrUn_KI270386v1	1	1788	0	0	0	0	0	0
chrUn_KI270391v1	1	1484	0	0	0	0	0	0
chrUn_KI270383v1	1	1750	0	0	0	0	0	0
chrUn_KI270392v1	1	971	0	0	0	0	0	0
chrUn_KI270385v1	1	990	0	0	0	0	0	0
chrUn_KI270376v1	1	1136	0	0	0	0	0	0
chrUn_KI270374v1	1	2656	0	0	0	0	0	0
chrUn_KI270373v1	1	1451	0	0	0	0	0	0
chrUn_KI270375v1	1	2378	0	0	0	0	0	0
chrUn_KI270371v1	1	2805	0	0	0	0	0	0
